# Supplementary material
Source: HighWire-hosted journal article supplement (https://jcp.bmj.com/content/jclinpath-2020-206867)
Supplement: inline-supplementary-material-3 [file inline-supplementary-material-3.xlsx]

## Sheet: Sheet1
Supplemental Table 3: Genetic variations in ACE2
								GenomAD																											1000G
								Total			African			Latino			Ashkenazi Jewish			East Asian			European (Finnish)			European (non-Finnish)			Other			Southe Asian			Total			ACB			ASW			BEB			CDX
Chromosome	Position	rsID	Reference	Alternate	Consequence	Transcript Consequence	Annotation	Allele Number	Allele Count	Allele Frequency	Allele Number	Allele Count	Allele Frequency	Allele Number	Allele Count	Allele Frequency	Allele Number	Allele Count	Allele Frequency	Allele Number	Allele Count	Allele Frequency	Allele Number	Allele Count	Allele Frequency	Allele Number	Allele Count	Allele Frequency	Allele Number	Allele Count	Allele Frequency	Allele Number	Allele Count	Allele Frequency	Allele Number	Allele Count	Allele Frequency	Allele Number	Allele Count	Allele Frequency	Allele Number	Allele Count	Allele Frequency	Allele Number	Allele Count	Allele Frequency	Allele Number	Allele Count	Allele Frequency
X	15619032	rs768110251	C	T	p.Met1?	c.3G>A	start_lost	169257	1	0.000590818	12879	0	0	24762	0	0	6510	1	0.015361	13092	0	0	15557	0	0	76997	0	0	4138	0	0	15322	0	0	3775	0	0	145	0	0	96	0	0	130	0	0	142	0	0
X	15619027	rs1180242786	C	T	p.Ser3Asn	c.8G>A	missense	171343	1	0.000583625	12915	0	0	25152	0	0	6684	0	0	13184	0	0	15640	0	0	77742	0	0	4189	0	0	15837	1	0.00631433	3775	0	0	145	0	0	96	0	0	130	0	0	142	0	0
X	15619020	rs775089013	G	C	p.Ser5Ser	c.15C>G	synonymous	174124	4	0.00229721	12975	0	0	25550	0	0	6924	0	0	13313	4	0.0300458	15750	0	0	78776	0	0	4265	0	0	16571	0	0	3775	0	0	145	0	0	96	0	0	130	0	0	142	0	0
X	15619013	rs201035388	G	A	p.Leu8Phe	c.22C>T	missense	198557	16	0.00805814	18898	2	0.0105831	26670	1	0.00374953	7275	0	0	14457	0	0	18444	0	0	90511	13	0.0143629	5127	0	0	17175	0	0	3775	0	0	145	0	0	96	0	0	130	0	0	142	0	0
X	15619009	rs746202722	A	G	p.Leu9Pro	c.26T>C	missense	177638	1	0.000562943	13063	0	0	26286	0	0	7150	0	0	13531	0	0	15865	0	0	79968	1	0.0012505	4357	0	0	17418	0	0	3775	0	0	145	0	0	96	0	0	130	0	0	142	0	0
X	15619008	rs1463669655	G	A	p.Leu9Leu	c.27C>T	synonymous	199968	2	0.00100016	18936	0	0	26954	0	0	7359	0	0	14540	2	0.0137552	18498	0	0	90950	0	0	5173	0	0	17558	0	0	3775	0	0	145	0	0	96	0	0	130	0	0	142	0	0
X	15618996	rs779538833	A	G	p.Ala13Ala	c.39T>C	synonymous	180088	9	0.00499756	13102	0	0	26643	1	0.00375333	7311	0	0	13636	7	0.0513347	15955	0	0	80917	0	0	4431	0	0	18093	1	0.005527	3775	0	0	145	0	0	96	0	0	130	0	0	142	0	0
X	15618980	rs73635825	A	G	p.Ser19Pro	c.55T>C	missense	204526	64	0.0312919	18961	63	0.332261	27865	0	0	7636	0	0	14802	0	0	18606	0	0	92463	0	0	5314	1	0.0188182	18879	0	0	3775	3	0.0794702	145	0	0	96	0	0	130	0	0	142	0	0
X	15618975	rs372345059	G	A	p.Thr20Thr	c.60C>T	synonymous	182839	1	0.000546929	13152	1	0.00760341	27268	0	0	7463	0	0	13814	0	0	16000	0	0	81709	0	0	4512	0	0	18921	0	0	3775	0	0	145	0	0	96	0	0	130	0	0	142	0	0
X	15618974	rs778030746	T	C	p.Ile21Val	c.61A>G	missense	183033	2	0.0010927	13157	0	0	27320	0	0	7473	0	0	13828	0	0	16001	0	0	81754	2	0.00244636	4517	0	0	18983	0	0	3775	0	0	145	0	0	96	0	0	130	0	0	142	0	0
X	15618973	rs1244687367	A	G	p.Ile21Thr	c.62T>C	missense	183065	1	0.000546254	13158	0	0	27322	1	0.00366005	7475	0	0	13830	0	0	16003	0	0	81769	0	0	4517	0	0	18991	0	0	3775	0	0	145	0	0	96	0	0	130	0	0	142	0	0
X	15618968	rs756231991	C	T	p.Glu23Lys	c.67G>A	missense	183225	1	0.000545777	13160	0	0	27357	0	0	7480	0	0	13835	0	0	16003	0	0	81846	1	0.00122181	4525	0	0	19019	0	0	3775	0	0	145	0	0	96	0	0	130	0	0	142	0	0
X	15618960	rs761614932	G	A	p.Ala25Ala	c.75C>T	synonymous	183292	1	0.000545578	13161	0	0	27379	0	0	7484	0	0	13838	1	0.00722648	16006	0	0	81861	0	0	4528	0	0	19035	0	0	3775	1	0.0264901	145	0	0	96	0	0	130	0	0	142	1	0.704225
X	15618959	rs1299103394	T	C	p.Lys26Glu	c.76A>G	missense	183326	1	0.000545476	13161	0	0	27386	0	0	7485	0	0	13844	0	0	16008	0	0	81870	1	0.00122145	4527	0	0	19045	0	0	3775	0	0	145	0	0	96	0	0	130	0	0	142	0	0
X	15618958	rs4646116	T	C	p.Lys26Arg	c.77A>G	missense	205238	797	0.38833	19021	18	0.0946322	28011	91	0.324872	7662	91	1.18768	14842	1	0.00673764	18622	9	0.0483299	92708	544	0.586789	5328	18	0.337838	19044	25	0.131275	3775	8	0.211921	145	0	0	96	2	2.08333	130	0	0	142	0	0
X	15618956	rs781255386	T	C	p.Thr27Ala	c.79A>G	missense	183319	2	0.00109099	13162	0	0	27385	2	0.00730327	7485	0	0	13843	0	0	16006	0	0	81875	0	0	4529	0	0	19034	0	0	3775	0	0	145	0	0	96	0	0	130	0	0	142	0	0
X	15618942	rs758278442	C	T	p.Lys31Lys	c.93G>A	synonymous	183360	3	0.00163613	13162	0	0	27387	0	0	7486	0	0	13846	3	0.0216669	16008	0	0	81891	0	0	4529	0	0	19051	0	0	3775	0	0	145	0	0	96	0	0	130	0	0	142	0	0
X	15618933	rs368655410	G	A	p.His34His	c.102C>T	synonymous	205294	130	0.0633238	19034	0	0	28015	0	0	7659	25	0.326413	14839	4	0.026956	18624	62	0.332904	92728	31	0.0334311	5332	3	0.0562641	19063	5	0.0262288	3775	0	0	145	0	0	96	0	0	130	0	0	142	0	0
X	15618932	rs1348114695	C	T	p.Glu35Lys	c.103G>A	missense	183374	3	0.001636	13162	0	0	27394	0	0	7482	0	0	13847	2	0.0144436	16008	0	0	81891	1	0.00122114	4529	0	0	19061	0	0	3775	0	0	145	0	0	96	0	0	130	0	0	142	0	0
X	15618930	.	T	A	p.Glu35Asp	c.105A>T	missense	ND	0	0	ND	0	0	ND	0	0	ND	0	0	ND	0	0	ND	0	0	ND	0	0	ND	0	0	ND	0	0	3775	0	0	145	0	0	96	0	0	130	0	0	142	0	0
X	15618927	rs768558803	G	A	p.Ala36Ala	c.108C>T	synonymous	183339	4	0.00218175	13162	0	0	27384	0	0	7480	0	0	13844	0	0	16006	0	0	81882	2	0.00244254	4527	0	0	19054	2	0.0104965	3775	2	0.0529801	145	0	0	96	0	0	130	0	0	142	0	0
X	15618926	rs146676783	C	T	p.Glu37Lys	c.109G>A	missense	205282	8	0.00389708	19045	2	0.0105014	28010	0	0	7656	0	0	14842	0	0	18622	6	0.03222	92723	0	0	5329	0	0	19055	0	0	3775	0	0	145	0	0	96	0	0	130	0	0	142	0	0
X	15618918	rs199804629	C	T	p.Leu39Leu	c.117G>A	synonymous	205252	56	0.0272835	19062	0	0	27994	1	0.00357219	7660	47	0.613577	14840	0	0	18625	0	0	92708	5	0.00539328	5328	3	0.0563063	19035	0	0	3775	1	0.0264901	145	0	0	96	0	0	130	0	0	142	0	0
X	15618915	rs924799658	G	C	p.Phe40Leu	c.120C>G	missense	22050	1	0.00453515	5931	1	0.0168606	628	0	0	179	0	0	1007	0	0	2624	0	0	10876	0	0	805	0	0				3775	0	0	145	0	0	96	0	0	130	0	0	142	0	0
X	15618915	rs924799658	G	T	p.Phe40Leu	c.120C>A	missense	183233	3	0.00163726	13160	0	0	27349	3	0.0109693	7480	0	0	13834	0	0	16003	0	0	81854	0	0	4523	0	0	19030	0	0	3775	0	0	145	0	0	96	0	0	130	0	0	142	0	0
X	15618906	rs1447927937	A	T	p.Ser43Arg	c.129T>A	missense	183088	1	0.000546185	13157	0	0	27320	0	0	7477	0	0	13824	0	0	16003	0	0	81803	0	0	4516	0	0	18988	1	0.00526648	3775	0	0	145	0	0	96	0	0	130	0	0	142	0	0
X	15618903	rs763637942	T	A	p.Ser44Ser	c.132A>T	synonymous	182762	1	0.00054716	13157	0	0	27241	0	0	7464	0	0	13811	0	0	16002	0	0	81701	1	0.00122398	4514	0	0	18872	0	0	3775	0	0	145	0	0	96	0	0	130	0	0	142	0	0
X	15618886	rs1192192618	T	A	p.Tyr50Phe	c.149A>T	missense	182425	1	0.00054817	13158	0	0	27248	0	0	7445	0	0	13808	0	0	15969	0	0	81490	1	0.00122714	4510	0	0	18797	0	0	3775	0	0	145	0	0	96	0	0	130	0	0	142	0	0
X	15618884	rs760159085	T	C	p.Asn51Asp	c.151A>G	missense	182315	1	0.000548501	13157	0	0	27245	0	0	7436	0	0	13810	0	0	15963	0	0	81423	0	0	4507	0	0	18774	1	0.00532652	3775	0	0	145	0	0	96	0	0	130	0	0	142	0	0
X	15618883		T	C	p.Asn51Ser	c.152A>G	missense	182222	1	0.000548781	13156	0	0	27231	0	0	7436	0	0	13806	0	0	15958	0	0	81374	1	0.00122889	4506	0	0	18755	0	0	3775	0	0	145	0	0	96	0	0	130	0	0	142	0	0
X	15618872	rs775273812	T	C	p.Thr55Ala	c.163A>G	missense	181057	1	0.000552312	13144	0	0	27127	0	0	7341	0	0	13795	0	0	15910	0	0	80855	1	0.00123678	4489	0	0	18396	0	0	3775	0	0	145	0	0	96	0	0	130	0	0	142	0	0
X	15618863	rs1222417695	T	G	p.Asn58His	c.172A>C	missense	179048	2	0.00111702	13118	0	0	26887	0	0	7204	0	0	13739	0	0	15813	0	0	80080	2	0.0024975	4442	0	0	17765	0	0	3775	0	0	145	0	0	96	0	0	130	0	0	142	0	0
X	15618861	rs771621249	A	T	p.Asn58Lys	c.174T>A	missense	178783	2	0.00111867	13115	0	0	26862	0	0	7201	0	0	13742	0	0	15792	0	0	79953	0	0	4428	0	0	17690	2	0.0113058	3775	0	0	145	0	0	96	0	0	130	0	0	142	0	0
X	15618856	rs759162332	T	C	p.Gln60Arg	c.179A>G	missense	177849	2	0.00112455	13113	0	0	26801	0	0	7125	0	0	13726	0	0	15740	0	0	79515	2	0.00251525	4420	0	0	17409	0	0	3775	0	0	145	0	0	96	0	0	130	0	0	142	0	0
X	15618855	rs774593309	T	C	p.Gln60Gln	c.180A>G	synonymous	177606	4	0.00225218	13109	1	0.00762835	26769	0	0	7110	0	0	13718	0	0	15722	1	0.00636051	79412	2	0.00251851	4410	0	0	17356	0	0	3775	0	0	145	0	0	96	0	0	130	0	0	142	0	0
X	15618851	rs1325542104	T	C	p.Met62Val	c.184A>G	missense	176477	1	0.000566646	13086	0	0	26576	0	0	7008	0	0	13675	0	0	15690	0	0	78985	1	0.00126606	4375	0	0	17082	0	0	3775	0	0	145	0	0	96	0	0	130	0	0	142	0	0
X	15618849	.	C	T	p.Met62Ile	c.186G>A	missense	ND	0	0	ND	0	0	ND	0	0	ND	0	0	ND	0	0	ND	0	0	ND	0	0	ND	0	0	ND	0	0	3775	0	0	145	0	0	96	0	0	130	0	0	142	0	0
X	15613121	rs1199100713	A	T	p.Asn64Lys	c.192T>A	missense	204583	3	0.0014664	19074	2	0.0104855	27919	0	0	7644	0	0	14803	0	0	18445	0	0	92536	1	0.00108066	5327	0	0	18835	0	0	3775	0	0	145	0	0	96	0	0	130	0	0	142	0	0
X	15613115	rs370473130	C	T	p.Gly66Gly	c.198G>A	synonymous	204555	6	0.0029332	19022	6	0.0315424	27940	0	0	7649	0	0	14785	0	0	18477	0	0	92488	0	0	5325	0	0	18869	0	0	3775	0	0	145	0	0	96	0	0	130	0	0	142	0	0
X	15613112	rs1254567742	G	A	p.Asp67Asp	c.201C>T	synonymous	182658	1	0.000547471	13133	0	0	27330	0	0	7471	0	0	13799	1	0.0072469	15869	0	0	81678	0	0	4509	0	0	18869	0	0	3775	0	0	145	0	0	96	0	0	130	0	0	142	0	0
X	15613111	rs755691167	T	C	p.Lys68Glu	c.202A>G	missense	182720	2	0.00109457	13138	0	0	27336	0	0	7472	0	0	13806	0	0	15887	0	0	81701	0	0	4510	0	0	18870	2	0.0105988	3775	0	0	145	0	0	96	0	0	130	0	0	142	0	0
X	15613100	rs752154414	G	A	p.Ala71Ala	c.213C>T	synonymous	182609	1	0.000547618	13134	0	0	27309	0	0	7471	0	0	13804	1	0.00724428	15906	0	0	81652	0	0	4514	0	0	18819	0	0	3775	0	0	145	0	0	96	0	0	130	0	0	142	0	0
X	15613099	rs1256007252	A	C	p.Phe72Val	c.214T>G	missense	182678	1	0.000547411	13140	0	0	27321	0	0	7472	0	0	13806	1	0.00724323	15905	0	0	81693	0	0	4518	0	0	18823	0	0	3775	0	0	145	0	0	96	0	0	130	0	0	142	0	0
X	15613067	rs766996587	C	T	p.Met82Ile	c.246G>A	missense	204769	5	0.00244178	19063	5	0.0262288	27926	0	0	7652	0	0	14830	0	0	18563	0	0	92590	0	0	5336	0	0	18809	0	0	3775	0	0	145	0	0	96	0	0	130	0	0	142	0	0
X	15613063	rs759134032	G	T	p.Pro84Thr	c.250C>A	missense	182792	1	0.00054707	13143	0	0	27310	0	0	7470	0	0	13826	0	0	15953	0	0	81743	0	0	4524	0	0	18823	1	0.00531265	3775	0	0	145	0	0	96	0	0	130	0	0	142	0	0
X	15613060	rs376392863	G	A	p.Leu85Leu	c.253C>T	synonymous	204784	9	0.00439487	19070	6	0.031463	27925	3	0.0107431	7659	0	0	14838	0	0	18584	0	0	92593	0	0	5339	0	0	18776	0	0	3775	0	0	145	0	0	96	0	0	130	0	0	142	0	0
X	15613056	rs746808776	T	C	p.Gln86Arg	c.257A>G	missense	182797	2	0.00109411	13151	0	0	27311	0	0	7481	0	0	13821	0	0	15970	0	0	81743	2	0.00244669	4521	0	0	18799	0	0	3775	0	0	145	0	0	96	0	0	130	0	0	142	0	0
X	15613038	rs763395248	G	A	p.Thr92Ile	c.275C>T	missense	182553	2	0.00109557	13147	0	0	27267	0	0	7477	0	0	13814	0	0	15953	0	0	81689	2	0.00244831	4514	0	0	18692	0	0	3775	0	0	145	0	0	96	0	0	130	0	0	142	0	0
X	15613013	rs1390680136	A	G	p.Leu100Leu	c.300T>C	synonymous	182041	1	0.000549327	13118	0	0	27161	0	0	7459	0	0	13767	0	0	15909	0	0	81540	0	0	4497	0	0	18590	1	0.00537924	3775	0	0	145	0	0	96	0	0	130	0	0	142	0	0
X	15613008	rs1395878099	T	G	p.Gln102Pro	c.305A>C	missense	203458	3	0.00147451	19003	0	0	27654	0	0	7630	0	0	14757	0	0	18513	0	0	92270	2	0.00216755	5292	1	0.0188964	18339	0	0	3775	0	0	145	0	0	96	0	0	130	0	0	142	0	0
X	15613006	rs143158922	T	G	p.Asn103His	c.307A>C	missense	203396	4	0.00196661	18992	4	0.0210615	27642	0	0	7622	0	0	14750	0	0	18517	0	0	92245	0	0	5294	0	0	18334	0	0	3775	0	0	145	0	0	96	0	0	130	0	0	142	0	0
X	15612993	rs139773121	A	G	p.Val107Ala	c.320T>C	missense	180910	2	0.00110552	13112	2	0.0152532	26909	0	0	7410	0	0	13715	0	0	15869	0	0	81298	0	0	4489	0	0	18108	0	0	3775	0	0	145	0	0	96	0	0	130	0	0	142	0	0
X	15612969	rs201900069	C	T	p.Arg115Gln	c.344G>A	missense	199638	34	0.0170308	18872	0	0	26738	0	0	7481	0	0	14493	11	0.0758987	18321	0	0	91316	23	0.0251873	5212	0	0	17205	0	0	3775	1	0.0264901	145	0	0	96	0	0	130	0	0	142	0	0
X	15610444	rs1340886951	A	T	p.Leu116Ter	c.347T>A	stop_gained	155308	1	0.000643882	11862	0	0	20293	0	0	6134	1	0.0163026	11509	0	0	15083	0	0	72916	0	0	3597	0	0	13914	0	0	3775	0	0	145	0	0	96	0	0	130	0	0	142	0	0
X	15610437	rs754488878	T	C	p.Thr118Thr	c.354A>G	synonymous	156138	1	0.000640459	11843	0	0	20495	0	0	6221	0	0	11493	0	0	15188	0	0	73175	1	0.00136659	3638	0	0	14085	0	0	3775	0	0	145	0	0	96	0	0	130	0	0	142	0	0
X	15610410	rs1398027862	G	A	p.Tyr127Tyr	c.381C>T	synonymous	173771	1	0.00057547	12676	0	0	25231	0	0	7144	0	0	13087	0	0	15787	0	0	78863	0	0	4254	0	0	16729	1	0.00597764	3775	0	0	145	0	0	96	0	0	130	0	0	142	0	0
X	15610408	rs751227277	C	G	p.Ser128Thr	c.383G>C	missense	174274	1	0.000573809	12720	0	0	25317	0	0	7169	0	0	13158	0	0	15796	0	0	79021	0	0	4270	0	0	16823	1	0.00594424	3775	0	0	145	0	0	96	0	0	130	0	0	142	0	0
X	15610379	rs766124365	G	C	p.Pro138Ala	c.412C>G	missense	174434	1	0.000573283	12797	0	0	25326	0	0	7116	0	0	13221	0	0	15773	0	0	79208	1	0.0012625	4279	0	0	16714	0	0	3775	0	0	145	0	0	96	0	0	130	0	0	142	0	0
X	15610377	rs1457896076	T	C	p.Pro138Pro	c.414A>G	synonymous	174087	1	0.000574425	12790	0	0	25236	0	0	7076	0	0	13213	0	0	15764	1	0.00634357	79133	0	0	4261	0	0	16614	0	0	3775	0	0	145	0	0	96	0	0	130	0	0	142	0	0
X	15610369	rs1391451327	C	T	p.Cys141Tyr	c.422G>A	missense	171506	1	0.00058307	12702	1	0.00787278	24530	0	0	6956	0	0	13031	0	0	15675	0	0	78310	0	0	4180	0	0	16122	0	0	3775	0	0	145	0	0	96	0	0	130	0	0	142	0	0
X	15610368	rs1157386586	G	A	p.Cys141Cys	c.423C>T	synonymous	171364	1	0.000583553	12675	0	0	24479	0	0	6950	0	0	13025	1	0.00767754	15659	0	0	78312	0	0	4177	0	0	16087	0	0	3775	0	0	145	0	0	96	0	0	130	0	0	142	0	0
X	15610356	rs1469916451	T	C	p.Glu145Glu	c.435A>G	synonymous	165706	1	0.000603478	12545	0	0	22819	1	0.00438231	6582	0	0	12613	0	0	15434	0	0	76578	0	0	4003	0	0	15132	0	0	3775	0	0	145	0	0	96	0	0	130	0	0	142	0	0
X	15609957	rs1435872603	G	C	p.Asn154Lys	c.462C>G	missense	182589	2	0.00109536	13146	0	0	27187	2	0.00735646	7440	0	0	13812	0	0	15984	0	0	81553	0	0	4507	0	0	18960	0	0	3775	0	0	145	0	0	96	0	0	130	0	0	142	0	0
X	15609943	rs746034076	T	C	p.Asn159Ser	c.476A>G	missense	183282	3	0.00163682	13158	0	0	27400	1	0.00364964	7482	0	0	13858	0	0	15995	0	0	81790	2	0.00244529	4523	0	0	19076	0	0	3775	0	0	145	0	0	96	0	0	130	0	0	142	0	0
X	15609932	rs777568369	A	G	p.Trp163Arg	c.487T>C	missense	183299	1	0.000545557	13157	0	0	27408	0	0	7478	0	0	13857	0	0	16005	0	0	81797	1	0.00122254	4521	0	0	19076	0	0	3775	0	0	145	0	0	96	0	0	130	0	0	142	0	0
X	15609929	rs1316799731	C	A	p.Ala164Ser	c.490G>T	missense	183331	1	0.000545461	13159	1	0.00759936	27416	0	0	7483	0	0	13858	0	0	16004	0	0	81808	0	0	4525	0	0	19078	0	0	3775	0	0	145	0	0	96	0	0	130	0	0	142	0	0
X	15609923	rs769593006	C	G	p.Glu166Gln	c.496G>C	missense	183365	1	0.00054536	13159	0	0	27424	0	0	7483	0	0	13859	0	0	16006	0	0	81829	1	0.00122206	4527	0	0	19078	0	0	3775	0	0	145	0	0	96	0	0	130	0	0	142	0	0
X	15609912	rs1165363168	T	C	p.Arg169Arg	c.507A>G	synonymous	183355	2	0.00109078	13158	0	0	27419	0	0	7482	0	0	13855	0	0	16008	0	0	81828	2	0.00244415	4527	0	0	19078	0	0	3775	0	0	145	0	0	96	0	0	130	0	0	142	0	0
X	15609907	rs748076875	T	A	p.Glu171Val	c.512A>T	missense	183348	1	0.000545411	13158	0	0	27418	0	0	7481	0	0	13857	0	0	16008	0	0	81820	1	0.0012222	4528	0	0	19078	0	0	3775	0	0	145	0	0	96	0	0	130	0	0	142	0	0
X	15609906	rs1341206593	C	G	p.Glu171Asp	c.513G>C	missense	21953	1	0.00455519	5885	0	0	623	0	0	181	0	0	992	0	0	2616	0	0	10846	1	0.00921999	810	0	0				3775	0	0	145	0	0	96	0	0	130	0	0	142	0	0
X	15609903	rs781175759	G	A	p.Val172Val	c.516C>T	synonymous	183317	4	0.00218201	13158	0	0	27410	3	0.0109449	7482	0	0	13857	0	0	16008	0	0	81798	1	0.00122252	4527	0	0	19077	0	0	3775	0	0	145	0	0	96	0	0	130	0	0	142	0	0
X	15609902	rs754511501	C	T	p.Gly173Ser	c.517G>A	missense	183342	4	0.00218172	13158	0	0	27415	0	0	7485	0	0	13859	0	0	16009	0	0	81812	3	0.00366694	4527	0	0	19077	1	0.00524191	3775	0	0	145	0	0	96	0	0	130	0	0	142	0	0
X	15609900	rs751083544	G	C	p.Gly173Gly	c.519C>G	synonymous	205159	4	0.00194971	18999	4	0.0210537	28034	0	0	7662	0	0	14842	0	0	18617	0	0	92598	0	0	5332	0	0	19075	0	0	3775	0	0	145	0	0	96	0	0	130	0	0	142	0	0
X	15609886	rs779651019	G	A	p.Pro178Leu	c.533C>T	missense	183318	1	0.0005455	13155	0	0	27415	0	0	7487	0	0	13858	0	0	16006	0	0	81796	1	0.00122255	4523	0	0	19078	0	0	3775	0	0	145	0	0	96	0	0	130	0	0	142	0	0
X	15609882	rs1192307729	T	C	p.Leu179Leu	c.537A>G	synonymous	183328	1	0.00054547	13157	1	0.00760052	27419	0	0	7487	0	0	13858	0	0	16008	0	0	81800	0	0	4523	0	0	19076	0	0	3775	0	0	145	0	0	96	0	0	130	0	0	142	0	0
X	15609868	rs758142853	A	C	p.Val184Gly	c.551T>G	missense	21817	1	0.00458358	5834	0	0	613	0	0	180	0	0	998	0	0	2595	0	0	10793	1	0.00926526	804	0	0				3775	0	0	145	0	0	96	0	0	130	0	0	142	0	0
X	15609868	rs758142853	A	G	p.Val184Ala	c.551T>C	missense	183275	8	0.00436503	13157	0	0	27414	0	0	7482	0	0	13855	8	0.0577409	16005	0	0	81769	0	0	4522	0	0	19071	0	0	3775	0	0	145	0	0	96	0	0	130	0	0	142	0	0
X	15609862	rs750052167	A	G	p.Leu186Ser	c.557T>C	missense	183100	1	0.00054615	13156	0	0	27388	1	0.00365123	7468	0	0	13849	0	0	16003	0	0	81676	0	0	4519	0	0	19041	0	0	3775	0	0	145	0	0	96	0	0	130	0	0	142	0	0
X	15609850	rs976723413	A	G	p.Met190Thr	c.569T>C	missense	182952	1	0.000546591	13154	0	0	27342	0	0	7444	0	0	13843	0	0	15994	0	0	81637	0	0	4509	0	0	19029	1	0.00525514	3775	0	0	145	0	0	96	0	0	130	0	0	142	0	0
X	15609848	rs765733397	C	G	p.Ala191Pro	c.571G>C	missense	182876	1	0.000546819	13154	0	0	27335	0	0	7438	0	0	13840	0	0	15985	0	0	81596	1	0.00122555	4510	0	0	19018	0	0	3775	0	0	145	0	0	96	0	0	130	0	0	142	0	0
X	15609841	rs762219565	G	T	p.Ala193Glu	c.578C>A	missense	182786	3	0.00164126	13154	0	0	27345	3	0.0109709	7421	0	0	13843	0	0	15966	0	0	81537	0	0	4506	0	0	19014	0	0	3775	0	0	145	0	0	96	0	0	130	0	0	142	0	0
X	15609836	rs764661406	G	T	p.His195Asn	c.583C>A	missense	182606	1	0.000547627	13149	0	0	27309	0	0	7404	0	0	13839	0	0	15947	0	0	81458	0	0	4503	0	0	18997	1	0.00526399	3775	0	0	145	0	0	96	0	0	130	0	0	142	0	0
X	15609836	rs764661406	G	A	p.His195Tyr	c.583C>T	missense	182606	1	0.000547627	13149	0	0	27309	0	0	7404	0	0	13839	0	0	15947	0	0	81458	1	0.00122763	4503	0	0	18997	0	0	3775	0	0	145	0	0	96	0	0	130	0	0	142	0	0
X	15607580	rs761805536	CTGTT	C	c.584-5_584-2delAACA	c.584-5_584-2delAACA	splice_acceptor	166217	4	0.00240649	12706	0	0	23598	0	0	6740	0	0	12486	1	0.00800897	15144	0	0	76245	2	0.00262312	3999	0	0	15299	1	0.00653637	3775	0	0	145	0	0	96	0	0	130	0	0	142	0	0
X	15607575	rs1416468883	A	G	p.Tyr196Tyr	c.588T>C	synonymous	20301	1	0.00492587	5590	1	0.0178891	529	0	0	176	0	0	974	0	0	2141	0	0	10163	0	0	728	0	0				3775	0	0	145	0	0	96	0	0	130	0	0	142	0	0
X	15607572	rs1214041216	C	T	p.Glu197Glu	c.591G>A	synonymous	190769	2	0.00104839	18497	0	0	25424	0	0	7139	0	0	13742	0	0	17789	0	0	87736	2	0.00227957	4878	0	0	15564	0	0	3775	0	0	145	0	0	96	0	0	130	0	0	142	0	0
X	15607571	rs1345857521	C	T	p.Asp198Asn	c.592G>A	missense	170020	1	0.000588166	12838	0	0	24873	0	0	6956	0	0	12782	0	0	15468	0	0	77419	1	0.00129167	4131	0	0	15553	0	0	3775	0	0	145	0	0	96	0	0	130	0	0	142	0	0
X	15607567	rs750145841	T	C	p.Tyr199Cys	c.596A>G	missense	177749	3	0.00168777	13022	0	0	26661	1	0.0037508	7287	0	0	13428	0	0	15718	0	0	80074	2	0.00249769	4392	0	0	17167	0	0	3775	0	0	145	0	0	96	0	0	130	0	0	142	0	0
X	15607563	rs1039062494	C	A	p.Gly200Gly	c.600G>T	synonymous	178950	1	0.000558815	13038	0	0	26852	0	0	7336	0	0	13511	0	0	15776	0	0	80472	1	0.00124267	4431	0	0	17534	0	0	3775	0	0	145	0	0	96	0	0	130	0	0	142	0	0
X	15607552	rs779790336	C	G	p.Arg204Thr	c.611G>C	missense	182431	1	0.000548152	13126	0	0	27297	0	0	7460	0	0	13779	0	0	15890	0	0	81493	0	0	4509	0	0	18877	1	0.00529745	3775	1	0.0264901	145	0	0	96	0	0	130	1	0.769231	142	0	0
X	15607546	rs142443432	T	C	p.Asp206Gly	c.617A>G	missense	203334	61	0.0299999	18779	2	0.0106502	27877	1	0.00358719	7643	0	0	14789	0	0	18177	0	0	91862	58	0.0631382	5266	0	0	18941	0	0	3775	0	0	145	0	0	96	0	0	130	0	0	142	0	0
X	15607543	rs754237613	T	C	p.Tyr207Cys	c.620A>G	missense	182860	1	0.000546866	13132	0	0	27348	0	0	7473	0	0	13823	0	0	15918	0	0	81651	1	0.00122472	4520	0	0	18995	0	0	3775	0	0	145	0	0	96	0	0	130	0	0	142	0	0
X	15607538	rs1327824339	C	T	p.Val209Ile	c.625G>A	missense	182904	1	0.000546735	13132	0	0	27349	0	0	7477	0	0	13834	0	0	15928	0	0	81656	1	0.00122465	4518	0	0	19010	0	0	3775	0	0	145	0	0	96	0	0	130	0	0	142	0	0
X	15607532	rs148771870	C	T	p.Gly211Arg	c.631G>A	missense	203924	261	0.127989	18849	5	0.0265266	27942	6	0.0214731	7654	0	0	14822	0	0	18298	29	0.158487	92062	179	0.194434	5268	5	0.0949127	19029	37	0.19444	3775	0	0	145	0	0	96	0	0	130	0	0	142	0	0
X	15607517	rs761269389	C	A	p.Asp216Tyr	c.646G>T	missense	183145	1	0.000546015	13147	0	0	27380	0	0	7482	0	0	13844	0	0	15960	0	0	81752	1	0.00122321	4524	0	0	19056	0	0	3775	0	0	145	0	0	96	0	0	130	0	0	142	0	0
X	15607515	rs753164828	G	T	p.Asp216Glu	c.648C>A	missense	204014	3	0.00147049	18822	0	0	27947	0	0	7652	0	0	14813	0	0	18327	0	0	92109	3	0.00325701	5291	0	0	19053	0	0	3775	0	0	145	0	0	96	0	0	130	0	0	142	0	0
X	15607508	rs372272603	G	A	p.Arg219Cys	c.655C>T	missense	203989	71	0.0348058	18806	3	0.0159524	27949	0	0	7654	0	0	14813	0	0	18355	0	0	92086	64	0.0695002	5282	1	0.0189322	19044	3	0.015753	3775	1	0.0264901	145	0	0	96	0	0	130	0	0	142	0	0
X	15607507	rs759590772	C	T	p.Arg219His	c.656G>A	missense	183089	18	0.00983128	13141	0	0	27371	0	0	7480	0	0	13840	0	0	15962	0	0	81724	1	0.00122363	4524	0	0	19047	17	0.0892529	3775	0	0	145	0	0	96	0	0	130	0	0	142	0	0
X	15607505	rs774621083	C	T	p.Gly220Ser	c.658G>A	missense	183045	3	0.00163894	13135	1	0.00761325	27362	1	0.0036547	7476	0	0	13840	0	0	15966	0	0	81713	1	0.0012238	4520	0	0	19033	0	0	3775	0	0	145	0	0	96	0	0	130	0	0	142	0	0
X	15607499	rs1479566186	A	G	p.Leu222Leu	c.664T>C	synonymous	183025	1	0.000546373	13136	0	0	27356	0	0	7474	0	0	13831	0	0	15968	0	0	81716	1	0.00122375	4520	0	0	19024	0	0	3775	0	0	145	0	0	96	0	0	130	0	0	142	0	0
X	15607479	rs1231367923	A	G	p.His228His	c.684T>C	synonymous	182643	1	0.000547516	13135	0	0	27305	0	0	7455	0	0	13808	0	0	15933	1	0.00627628	81595	0	0	4506	0	0	18906	0	0	3775	0	0	145	0	0	96	0	0	130	0	0	142	0	0
X	15607477	rs1204132218	G	A	p.Thr229Ile	c.686C>T	missense	182525	1	0.00054787	13132	0	0	27295	0	0	7455	0	0	13802	0	0	15911	0	0	81537	1	0.00122644	4504	0	0	18889	0	0	3775	0	0	145	0	0	96	0	0	130	0	0	142	0	0
X	15605961	rs1448326240	A	C	p.His239Gln	c.717T>G	missense	170658	1	0.000585967	12433	0	0	24601	0	0	7093	0	0	12596	0	0	15809	0	0	77561	1	0.00128931	4108	0	0	16457	0	0	3775	0	0	145	0	0	96	0	0	130	0	0	142	0	0
X	15605953	rs1360329820	G	A	p.Ala242Val	c.725C>T	missense	173873	3	0.0017254	12570	0	0	25396	0	0	7262	0	0	12843	0	0	15879	0	0	78543	3	0.00381956	4227	0	0	17153	0	0	3775	0	0	145	0	0	96	0	0	130	0	0	142	0	0
X	15605942	rs775542703	C	A	p.Ala246Ser	c.736G>T	missense	175960	1	0.000568311	12677	1	0.0078883	25844	0	0	7327	0	0	13063	0	0	15904	0	0	79240	0	0	4287	0	0	17618	0	0	3775	0	0	145	0	0	96	0	0	130	0	0	142	0	0
X	15605923	rs771769548	T	C	p.Tyr252Cys	c.755A>G	missense	177263	2	0.00112827	12792	0	0	26121	0	0	7352	0	0	13194	0	0	15931	0	0	79690	2	0.00250973	4323	0	0	17860	0	0	3775	0	0	145	0	0	96	0	0	130	0	0	142	0	0
X	15605908	rs745514718	C	T	p.Ser257Asn	c.770G>A	missense	194512	5	0.00257054	18289	0	0	25795	0	0	7411	0	0	13707	5	0.0364777	18425	0	0	88876	0	0	4979	0	0	17030	0	0	3775	1	0.0264901	145	0	0	96	0	0	130	0	0	142	1	0.704225
X	15605902	rs1161338919	A	G	p.Ile259Thr	c.776T>C	missense	194044	2	0.00103069	18283	2	0.0109391	25684	0	0	7393	0	0	13688	0	0	18414	0	0	88772	0	0	4984	0	0	16826	0	0	3775	0	0	145	0	0	96	0	0	130	0	0	142	0	0
X	15605891	rs200745906	G	A	p.Pro263Ser	c.787C>T	missense	190175	11	0.00578415	18087	0	0	24876	0	0	7201	0	0	13315	0	0	18330	0	0	87442	11	0.0125798	4881	0	0	16043	0	0	3775	0	0	145	0	0	96	0	0	130	0	0	142	0	0
X	15605875	rs949916988	C	A	c.802+1G>T	c.802+1G>T	splice_donor	158808	1	0.000629691	11882	0	0	21724	0	0	6431	0	0	11558	0	0	15533	0	0	73683	1	0.00135717	3715	0	0	14282	0	0	3775	0	0	145	0	0	96	0	0	130	0	0	142	0	0
X	15603690	rs766319182	T	C	p.Met270Val	c.808A>G	missense	167617	5	0.00298299	12645	0	0	22766	0	0	6684	0	0	12577	0	0	15693	0	0	77545	5	0.00644787	4069	0	0	15638	0	0	3775	0	0	145	0	0	96	0	0	130	0	0	142	0	0
X	15603659	rs1451564530	G	T	p.Ser280Tyr	c.839C>A	missense	176947	1	0.000565141	12921	0	0	25625	0	0	7287	0	0	13316	0	0	15921	0	0	80188	1	0.00124707	4347	0	0	17342	0	0	3775	0	0	145	0	0	96	0	0	130	0	0	142	0	0
X	15603646	rs1344315438	G	A	p.Pro284Pro	c.852C>T	synonymous	176663	1	0.000566049	12923	0	0	25566	0	0	7276	0	0	13323	0	0	15908	0	0	80081	1	0.00124874	4352	0	0	17234	0	0	3775	0	0	145	0	0	96	0	0	130	0	0	142	0	0
X	15603639	rs1165212018	G	T	p.Gln287Lys	c.859C>A	missense	176871	1	0.000565384	12919	0	0	25604	1	0.00390564	7286	0	0	13349	0	0	15923	0	0	80138	0	0	4349	0	0	17303	0	0	3775	0	0	145	0	0	96	0	0	130	0	0	142	0	0
X	15603638	rs763264372	T	C	p.Gln287Arg	c.860A>G	missense	176664	1	0.000566046	12928	0	0	25521	0	0	7277	0	0	13330	0	0	15923	0	0	80142	1	0.00124779	4345	0	0	17198	0	0	3775	0	0	145	0	0	96	0	0	130	0	0	142	0	0
X	15603631	rs773273611	T	C	p.Pro289Pro	c.867A>G	synonymous	176556	1	0.000566393	12917	1	0.00774174	25543	0	0	7281	0	0	13297	0	0	15925	0	0	80072	0	0	4337	0	0	17184	0	0	3775	0	0	145	0	0	96	0	0	130	0	0	142	0	0
X	15603630	rs763994205	T	G	p.Asn290His	c.868A>C	missense	176486	2	0.00113323	12907	0	0	25519	0	0	7271	0	0	13287	0	0	15921	0	0	80088	1	0.00124863	4334	0	0	17159	1	0.00582785	3775	0	0	145	0	0	96	0	0	130	0	0	142	0	0
X	15603626	rs756358940	A	T	p.Ile291Lys	c.872T>A	missense	175856	3	0.00170594	12864	0	0	25398	0	0	7283	0	0	13224	0	0	15907	0	0	79839	3	0.00375756	4311	0	0	17030	0	0	3775	0	0	145	0	0	96	0	0	130	0	0	142	0	0
X	15603624	rs1248745003	C	T	p.Asp292Asn	c.874G>A	missense	175490	2	0.00113967	12840	0	0	25296	0	0	7274	0	0	13186	0	0	15899	0	0	79741	2	0.00250812	4291	0	0	16963	0	0	3775	0	0	145	0	0	96	0	0	130	0	0	142	0	0
X	15603614	rs776226831	T	C	p.Asp295Gly	c.884A>G	missense	171696	8	0.0046594	12658	0	0	24298	0	0	7122	0	0	12815	0	0	15845	1	0.00631114	78640	7	0.00890132	4185	0	0	16133	0	0	3775	0	0	145	0	0	96	0	0	130	0	0	142	0	0
X	15603609	rs772143709	T	A	p.Met297Leu	c.889A>T	missense	170898	1	0.000585144	12620	1	0.00792393	24067	0	0	7107	0	0	12731	0	0	15835	0	0	78404	0	0	4162	0	0	15972	0	0	3775	0	0	145	0	0	96	0	0	130	0	0	142	0	0
X	15603607	rs745744395	C	T	p.Met297Ile	c.891G>A	missense	170560	1	0.000586304	12606	0	0	23993	0	0	7091	0	0	12695	0	0	15824	0	0	78276	1	0.00127753	4152	0	0	15923	0	0	3775	0	0	145	0	0	96	0	0	130	0	0	142	0	0
X	15603599	rs773936807	T	C	p.Gln300Arg	c.899A>G	missense	168500	2	0.00118694	12539	0	0	23406	0	0	6991	0	0	12530	0	0	15780	0	0	77611	2	0.00257695	4089	0	0	15554	0	0	3775	0	0	145	0	0	96	0	0	130	0	0	142	0	0
X	15599507	rs749750821	C	T	p.Asp303Asn	c.907G>A	missense	166298	2	0.00120266	12477	0	0	24038	0	0	6540	0	0	12406	0	0	15544	0	0	76092	0	0	3988	0	0	15213	2	0.0131467	3775	1	0.0264901	145	0	0	96	0	0	130	1	0.769231	142	0	0
X	15599490	rs766518362	G	C	p.Phe308Leu	c.924C>G	missense	174409	1	0.000573365	12711	0	0	25632	0	0	7133	0	0	12955	0	0	15784	0	0	78835	1	0.00126847	4229	0	0	17130	0	0	3775	0	0	145	0	0	96	0	0	130	0	0	142	0	0
X	15599484	rs758382603	C	T	p.Glu310Glu	c.930G>A	synonymous	175597	1	0.000569486	12741	0	0	25838	0	0	7204	0	0	13007	0	0	15829	0	0	79280	0	0	4253	0	0	17445	1	0.0057323	3775	0	0	145	0	0	96	0	0	130	0	0	142	0	0
X	15599481	rs373974232	G	A	p.Ala311Ala	c.933C>T	synonymous	175962	3	0.00170491	12748	0	0	25863	0	0	7249	0	0	13011	0	0	15841	0	0	79408	3	0.00377796	4265	0	0	17577	0	0	3775	0	0	145	0	0	96	0	0	130	0	0	142	0	0
X	15599481	rs373974232	G	C	p.Ala311Ala	c.933C>G	synonymous	197865	12	0.00606474	18617	6	0.0322286	26489	5	0.0188758	7432	0	0	14007	0	0	18476	0	0	90192	0	0	5075	1	0.0197044	17577	0	0	3775	0	0	145	0	0	96	0	0	130	0	0	142	0	0
X	15599480	rs780574871	C	T	p.Glu312Lys	c.934G>A	missense	176353	2	0.00113409	12775	2	0.0156556	25921	0	0	7249	0	0	13045	0	0	15859	0	0	79568	0	0	4281	0	0	17655	0	0	3775	1	0.0264901	145	0	0	96	0	0	130	0	0	142	0	0
X	15599475	rs775440758	C	T	p.Lys313Lys	c.939G>A	synonymous	198767	6	0.00301861	18670	0	0	26565	0	0	7474	0	0	14078	6	0.0426197	18524	0	0	90607	0	0	5090	0	0	17759	0	0	3775	0	0	145	0	0	96	0	0	130	0	0	142	0	0
X	15599474	rs1490929895	ACTT	A	p.Lys313del	c.937_939delAAG	inframe_deletion	177242	1	0.0005642	12805	0	0	26042	0	0	7321	0	0	13128	0	0	15898	0	0	79913	1	0.00125136	4290	0	0	17845	0	0	3775	0	0	145	0	0	96	0	0	130	0	0	142	0	0
X	15599466	rs767374564	T	C	p.Val316Val	c.948A>G	synonymous	200825	4	0.00199178	18803	0	0	26963	0	0	7550	1	0.013245	14337	2	0.0139499	18579	0	0	91308	1	0.00109519	5157	0	0	18128	0	0	3775	0	0	145	0	0	96	0	0	130	0	0	142	0	0
X	15599457	rs1221192598	A	T	p.Gly319Gly	c.957T>A	synonymous	179916	1	0.000555815	12986	0	0	26554	0	0	7402	0	0	13469	0	0	15965	0	0	80878	0	0	4376	0	0	18286	1	0.00546866	3775	0	0	145	0	0	96	0	0	130	0	0	142	0	0
X	15599437	rs759579097	C	T	p.Gly326Glu	c.977G>A	missense	181266	1	0.000551675	13058	1	0.00765814	26817	0	0	7441	0	0	13662	0	0	15989	0	0	81315	0	0	4443	0	0	18541	0	0	3775	0	0	145	0	0	96	0	0	130	0	0	142	0	0
X	15599428	rs143936283	T	C	p.Glu329Gly	c.986A>G	missense	203312	7	0.00344298	18943	0	0	27455	0	0	7625	0	0	14672	0	0	18621	0	0	92169	6	0.00650978	5250	1	0.0190476	18577	0	0	3775	0	0	145	0	0	96	0	0	130	0	0	142	0	0
X	15599420	rs185525294	T	A	p.Met332Leu	c.994A>T	missense	181343	3	0.00165432	13070	3	0.0229533	26816	0	0	7447	0	0	13663	0	0	15990	0	0	81331	0	0	4445	0	0	18581	0	0	3775	1	0.0264901	145	0	0	96	0	0	130	0	0	142	0	0
X	15599417	.	G	C	p.Leu332Val	c.997C>G	missense	ND	0	0	ND	0	0	ND	0	0	ND	0	0	ND	0	0	ND	0	0	ND	0	0	ND	0	0	ND	0	0	3775	0	0	145	0	0	96	0	0	130	0	0	142	0	0
X	15599412	rs1306455142	C	T	p.Thr334Thr	c.1002G>A	synonymous	181062	1	0.000552297	13056	0	0	26796	0	0	7440	0	0	13638	0	0	15983	0	0	81198	0	0	4426	0	0	18525	1	0.00539811	3775	0	0	145	0	0	96	0	0	130	0	0	142	0	0
X	15599405	rs762357444	C	G	p.Gly337Arg	c.1009G>C	missense	180777	1	0.000553168	13027	0	0	26715	0	0	7437	0	0	13609	0	0	15979	0	0	81153	1	0.00123224	4422	0	0	18435	0	0	3775	0	0	145	0	0	96	0	0	130	0	0	142	0	0
X	15599401	rs916715573	T	C	p.Asn338Ser	c.1013A>G	missense	180791	3	0.00165937	13041	0	0	26724	2	0.00748391	7431	0	0	13604	0	0	15979	0	0	81147	1	0.00123233	4430	0	0	18435	0	0	3775	0	0	145	0	0	96	0	0	130	0	0	142	0	0
X	15599398	rs772710779	A	C	p.Val339Gly	c.1016T>G	missense	180616	1	0.000553661	13034	0	0	26686	0	0	7423	0	0	13585	0	0	15974	0	0	81083	0	0	4427	0	0	18404	1	0.0054336	3775	0	0	145	0	0	96	0	0	130	0	0	142	0	0
X	15599392	rs138390800	T	C	p.Lys341Arg	c.1022A>G	missense	202403	81	0.0400192	18878	74	0.391991	27304	5	0.0183123	7600	0	0	14579	0	0	18601	0	0	91836	0	0	5230	2	0.0382409	18375	0	0	3775	3	0.0794702	145	1	0.689655	96	0	0	130	0	0	142	0	0
X	15599378	rs1410274315	G	A	p.Pro346Ser	c.1036C>T	missense	178589	1	0.000559945	12931	0	0	26352	0	0	7345	0	0	13388	0	0	15907	0	0	80336	1	0.00124477	4360	0	0	17970	0	0	3775	0	0	145	0	0	96	0	0	130	0	0	142	0	0
X	15599363	rs147464721	G	A	p.Leu351Leu	c.1051C>T	synonymous	196924	141	0.0716012	18657	124	0.66463	26436	13	0.0491754	7309	0	0	14126	0	0	18410	0	0	89744	2	0.00222856	5067	2	0.0394711	17175	0	0	3775	6	0.15894	145	0	0	96	0	0	130	0	0	142	0	0
X	15599361	rs1035663418	C	T	p.Leu351Leu	c.1053G>A	synonymous	174080	3	0.00172335	12781	0	0	25656	0	0	7056	0	0	13076	0	0	15753	0	0	78570	3	0.00381825	4235	0	0	16953	0	0	3775	0	0	145	0	0	96	0	0	130	0	0	142	0	0
X	15599359	rs370610075	C	A	p.Gly352Val	c.1055G>T	missense	173847	1	0.000575218	12788	0	0	25656	0	0	7025	0	0	13069	0	0	15739	0	0	78468	1	0.0012744	4222	0	0	16880	0	0	3775	0	0	145	0	0	96	0	0	130	0	0	142	0	0
X	15599351	rs961360700	C	T	p.Asp355Asn	c.1063G>A	missense	170310	2	0.00117433	12716	0	0	25097	0	0	6759	0	0	12887	0	0	15563	0	0	77178	2	0.00259141	4129	0	0	15981	0	0	3775	0	0	145	0	0	96	0	0	130	0	0	142	0	0
X	15596431	rs1205410066	T	A	p.Met360Leu	c.1078A>T	missense	180559	1	0.000553836	13120	0	0	27196	0	0	7422	0	0	13809	0	0	15139	0	0	80694	1	0.00123925	4461	0	0	18718	0	0	3775	0	0	145	0	0	96	0	0	130	0	0	142	0	0
X	15596412	rs758568640	A	G	p.Met366Thr	c.1097T>C	missense	182075	2	0.00109845	13148	0	0	27327	0	0	7465	0	0	13832	0	0	15614	0	0	81202	2	0.00246299	4483	0	0	19004	0	0	3775	0	0	145	0	0	96	0	0	130	0	0	142	0	0
X	15596408	rs750477605	G	A	p.Asp367Asp	c.1101C>T	synonymous	182073	1	0.00054923	13149	0	0	27335	0	0	7465	0	0	13833	0	0	15598	0	0	81197	0	0	4482	0	0	19014	1	0.00525928	3775	0	0	145	0	0	96	0	0	130	0	0	142	0	0
X	15596407	rs1228750646	C	T	p.Asp368Asn	c.1102G>A	missense	182108	1	0.000549125	13152	0	0	27333	1	0.00365858	7470	0	0	13832	0	0	15626	0	0	81204	0	0	4479	0	0	19012	0	0	3775	0	0	145	0	0	96	0	0	130	0	0	142	0	0
X	15596399	rs779083203	C	T	p.Leu370Leu	c.1110G>A	synonymous	182424	1	0.000548173	13157	0	0	27366	1	0.00365417	7470	0	0	13838	0	0	15748	0	0	81305	0	0	4492	0	0	19048	0	0	3775	0	0	145	0	0	96	0	0	130	0	0	142	0	0
X	15596388	rs1309363592	T	C	p.His374Arg	c.1121A>G	missense	182639	1	0.000547528	13158	0	0	27373	1	0.00365323	7472	0	0	13849	0	0	15841	0	0	81385	0	0	4498	0	0	19063	0	0	3775	0	0	145	0	0	96	0	0	130	0	0	142	0	0
X	15596387	rs757578476	A	G	p.His374His	c.1122T>C	synonymous	182660	1	0.000547465	13159	0	0	27373	0	0	7471	0	0	13849	0	0	15850	0	0	81399	1	0.00122852	4499	0	0	19060	0	0	3775	0	0	145	0	0	96	0	0	130	0	0	142	0	0
X	15596384	rs1395782023	C	A	p.Glu375Asp	c.1125G>T	missense	182690	3	0.00164213	13159	0	0	27376	3	0.0109585	7471	0	0	13849	0	0	15856	0	0	81416	0	0	4498	0	0	19065	0	0	3775	0	0	145	0	0	96	0	0	130	0	0	142	0	0
X	15596379	rs767462182	C	T	p.Gly377Glu	c.1130G>A	missense	182700	1	0.000547345	13160	0	0	27377	0	0	7471	0	0	13841	0	0	15872	0	0	81415	1	0.00122827	4503	0	0	19061	0	0	3775	0	0	145	0	0	96	0	0	130	0	0	142	0	0
X	15596376	rs142984500	T	C	p.His378Arg	c.1133A>G	missense	204754	18	0.00879104	19045	0	0	28005	0	0	7652	0	0	14830	0	0	18524	0	0	92323	18	0.0194968	5313	0	0	19062	0	0	3775	0	0	145	0	0	96	0	0	130	0	0	142	0	0
X	15596357	rs138689466	T	C	p.Ala384Ala	c.1152A>G	synonymous	ND	0	0	ND	0	0	ND	0	0	ND	0	0	ND	0	0	ND	0	0	ND	0	0	ND	0	0	ND	0	0	3775	0	0	145	0	0	96	0	0	130	0	0	142	0	0
X	15596354	.	A	G	p.Tyr385Tyr	c.1155T>C	synonymous	ND	0	0	ND	0	0	ND	0	0	ND	0	0	ND	0	0	ND	0	0	ND	0	0	ND	0	0	ND	0	0	3775	0	0	145	0	0	96	0	0	130	0	0	142	0	0
X	15596346	rs751572714	T	A	p.Gln388Leu	c.1163A>T	missense	182977	4	0.00218607	13160	0	0	27391	4	0.0146033	7475	0	0	13847	0	0	15977	0	0	81545	0	0	4509	0	0	19073	0	0	3775	0	0	145	0	0	96	0	0	130	0	0	142	0	0
X	15596345	rs773676270	T	C	p.Gln388Gln	c.1164A>G	synonymous	182982	12	0.00655802	13159	0	0	27392	0	0	7477	0	0	13851	0	0	15976	0	0	81544	2	0.00245266	4511	0	0	19072	10	0.0524329	3775	1	0.0264901	145	0	0	96	0	0	130	0	0	142	0	0
X	15596343	rs762890235	G	T	p.Pro389His	c.1166C>A	missense	182970	7	0.00382576	13160	0	0	27391	5	0.0182542	7475	0	0	13852	0	0	15971	0	0	81536	2	0.0024529	4509	0	0	19076	0	0	3775	0	0	145	0	0	96	0	0	130	0	0	142	0	0
X	15596320	rs1365935088	T	C	p.Asn397Asp	c.1189A>G	missense	204901	3	0.00146412	18976	0	0	28011	0	0	7652	0	0	14840	0	0	18608	0	0	92415	3	0.00324623	5326	0	0	19073	0	0	3775	0	0	145	0	0	96	0	0	130	0	0	142	0	0
X	15596317	rs772619843	C	T	p.Glu398Lys	c.1192G>A	missense	183075	1	0.000546224	13161	0	0	27400	0	0	7476	0	0	13850	0	0	15990	0	0	81608	1	0.00122537	4515	0	0	19075	0	0	3775	0	0	145	0	0	96	0	0	130	0	0	142	0	0
X	15596295	rs1418150776	C	T	p.Gly405Glu	c.1214G>A	missense	183126	1	0.000546072	13161	0	0	27406	0	0	7475	0	0	13851	0	0	15993	0	0	81650	1	0.00122474	4517	0	0	19073	0	0	3775	0	0	145	0	0	96	0	0	130	0	0	142	0	0
X	15596292	rs746336281	TCCC	T	p.Gly405del	c.1214_1216delGGG	inframe_deletion	183125	2	0.00109215	13161	0	0	27406	2	0.00729767	7478	0	0	13853	0	0	15991	0	0	81648	0	0	4515	0	0	19073	0	0	3775	0	0	145	0	0	96	0	0	130	0	0	142	0	0
X	15596291	rs1184887977	T	C	p.Glu406Glu	c.1218A>G	synonymous	183136	1	0.000546042	13161	0	0	27404	0	0	7477	0	0	13850	0	0	15996	0	0	81658	1	0.00122462	4517	0	0	19073	0	0	3775	0	0	145	0	0	96	0	0	130	0	0	142	0	0
X	15596288	rs1459623504	G	T	p.Ile407Ile	c.1221C>A	synonymous	183154	1	0.000545989	13161	0	0	27405	0	0	7477	0	0	13852	0	0	15998	0	0	81671	1	0.00122442	4517	0	0	19073	0	0	3775	0	0	145	0	0	96	0	0	130	0	0	142	0	0
X	15596264	rs769251490	A	T	p.Pro415Pro	c.1245T>A	synonymous	183118	1	0.000546096	13160	0	0	27394	0	0	7480	0	0	13849	1	0.00722074	15992	0	0	81664	0	0	4514	0	0	19065	0	0	3775	0	0	145	0	0	96	0	0	130	0	0	142	0	0
X	15596253	rs1209307377	T	G	p.Lys419Thr	c.1256A>C	missense	183062	1	0.000546263	13160	0	0	27386	0	0	7475	0	0	13848	1	0.00722126	15989	0	0	81637	0	0	4509	0	0	19058	0	0	3775	0	0	145	0	0	96	0	0	130	0	0	142	0	0
X	15596251	rs1384237654	A	G	p.Ser420Pro	c.1258T>C	missense	21984	1	0.00454876	5891	1	0.016975	621	0	0	185	0	0	1002	0	0	2619	0	0	10853	0	0	813	0	0				3775	0	0	145	0	0	96	0	0	130	0	0	142	0	0
X	15596247	rs1352508510	A	G	p.Ile421Thr	c.1262T>C	missense	183023	1	0.000546379	13158	0	0	27378	0	0	7476	0	0	13847	0	0	15981	0	0	81625	1	0.00122511	4510	0	0	19048	0	0	3775	0	0	145	0	0	96	0	0	130	0	0	142	0	0
X	15596243	rs1258744122	AC	A	p.Gly422ValfsTer15	c.1265delG	frameshift	182992	1	0.000546472	13158	0	0	27376	0	0	7473	0	0	13845	0	0	15974	0	0	81612	1	0.00122531	4508	0	0	19046	0	0	3775	0	0	145	0	0	96	0	0	130	0	0	142	0	0
X	15596233	rs1238146879	G	C	p.Pro426Ala	c.1276C>G	missense	182860	1	0.000546866	13155	0	0	27361	0	0	7467	0	0	13839	0	0	15950	0	0	81557	1	0.00122614	4509	0	0	19022	0	0	3775	0	0	145	0	0	96	0	0	130	0	0	142	0	0
X	15596231	rs1335386721	G	A	p.Pro426Pro	c.1278C>T	synonymous	182725	1	0.00054727	13153	0	0	27348	0	0	7465	0	0	13831	0	0	15941	0	0	81483	1	0.00122725	4501	0	0	19003	0	0	3775	0	0	145	0	0	96	0	0	130	0	0	142	0	0
X	15596230	rs1316056737	C	A	p.Asp427Tyr	c.1279G>T	missense	182681	2	0.0010948	13150	2	0.0152091	27341	0	0	7460	0	0	13833	0	0	15940	0	0	81477	0	0	4497	0	0	18983	0	0	3775	0	0	145	0	0	96	0	0	130	0	0	142	0	0
X	15593920	rs199569050	G	A	p.Asn437Asn	c.1311C>T	synonymous	158551	4	0.00252285	11901	0	0	21883	4	0.018279	6254	0	0	11641	0	0	15341	0	0	73414	0	0	3741	0	0	14376	0	0	3775	1	0.0264901	145	0	0	96	0	0	130	0	0	142	0	0
X	15593911	rs1017439564	G	C	p.Leu440Leu	c.1320C>G	synonymous	164789	1	0.000606837	12194	0	0	23416	0	0	6668	0	0	12064	0	0	15602	0	0	75450	1	0.00132538	3948	0	0	15447	0	0	3775	0	0	145	0	0	96	0	0	130	0	0	142	0	0
X	15593897	rs764772589	G	A	p.Thr445Met	c.1334C>T	missense	170376	1	0.000586937	12360	0	0	24853	0	0	7088	0	0	12445	0	0	15791	0	0	77167	0	0	4125	0	0	16547	1	0.00604339	3775	0	0	145	0	0	96	0	0	130	0	0	142	0	0
X	15593896	rs761297461	C	T	p.Thr445Thr	c.1335G>A	synonymous	171079	2	0.00116905	12403	0	0	24974	1	0.00400416	7107	0	0	12515	0	0	15804	1	0.00632751	77476	0	0	4142	0	0	16658	0	0	3775	0	0	145	0	0	96	0	0	130	0	0	142	0	0
X	15593893	rs1290769028	A	C	p.Ile446Met	c.1338T>G	missense	22028	1	0.00453968	5933	0	0	620	0	0	178	0	0	994	0	0	2598	0	0	10895	1	0.00917852	810	0	0				3775	0	0	145	0	0	96	0	0	130	0	0	142	0	0
X	15593892	rs776328956	C	A	p.Val447Phe	c.1339G>T	missense	194483	13	0.00668439	18399	0	0	25889	0	0	7358	0	0	13636	0	0	18435	5	0.0271223	88807	7	0.00788226	4995	1	0.02002	16964	0	0	3775	0	0	145	0	0	96	0	0	130	0	0	142	0	0
X	15593888	rs763655186	C	T	p.Gly448Glu	c.1343G>A	missense	173166	1	0.000577481	12494	0	0	25420	0	0	7201	0	0	12699	1	0.00787464	15849	0	0	78164	0	0	4199	0	0	17140	0	0	3775	0	0	145	0	0	96	0	0	130	0	0	142	0	0
X	15593887	.	C	T	p.Gly448Gly	c.1344G>A	synonymous	ND	0	0	ND	0	0	ND	0	0	ND	0	0	ND	0	0	ND	0	0	ND	0	0	ND	0	0	ND	0	0	3775	0	0	145	0	0	96	0	0	130	0	0	142	0	0
X	15593883	rs760321012	G	C	p.Leu450Val	c.1348C>G	missense	174830	1	0.000571984	12557	0	0	25782	0	0	7280	0	0	12853	0	0	15879	0	0	78747	1	0.00126989	4257	0	0	17475	0	0	3775	0	0	145	0	0	96	0	0	130	0	0	142	0	0
X	15593866	rs775744448	C	T	p.Met455Ile	c.1365G>A	missense	176940	1	0.000565163	12693	0	0	26189	0	0	7348	0	0	13083	0	0	15908	0	0	79462	0	0	4304	0	0	17953	1	0.0055701	3775	0	0	145	0	0	96	0	0	130	0	0	142	0	0
X	15593851	rs981162998	C	T	p.Arg460Arg	c.1380G>A	synonymous	178665	5	0.00279853	12806	0	0	26505	4	0.0150915	7394	0	0	13297	0	0	15929	0	0	80085	1	0.00124867	4360	0	0	18289	0	0	3775	0	0	145	0	0	96	0	0	130	0	0	142	0	0
X	15593850	rs1476137643	A	G	p.Trp461Arg	c.1381T>C	missense	178619	1	0.000559851	12816	0	0	26490	1	0.00377501	7393	0	0	13289	0	0	15921	0	0	80079	0	0	4361	0	0	18270	0	0	3775	0	0	145	0	0	96	0	0	130	0	0	142	0	0
X	15593844	rs772445388	C	T	p.Val463Ile	c.1387G>A	missense	179379	1	0.000557479	12873	0	0	26631	0	0	7396	0	0	13422	0	0	15937	0	0	80375	0	0	4393	0	0	18352	1	0.005449	3775	0	0	145	0	0	96	0	0	130	0	0	142	0	0
X	15593836	rs746405119	T	C	p.Lys465Lys	c.1395A>G	synonymous	179656	4	0.00222648	12933	0	0	26695	0	0	7385	0	0	13467	0	0	15933	0	0	80491	4	0.0049695	4408	0	0	18344	0	0	3775	0	0	145	0	0	96	0	0	130	0	0	142	0	0
X	15593835	rs774978137	C	A	p.Gly466Trp	c.1396G>T	missense	179425	1	0.000557336	12915	0	0	26664	0	0	7377	0	0	13444	1	0.00743826	15926	0	0	80406	0	0	4405	0	0	18288	0	0	3775	0	0	145	0	0	96	0	0	130	0	0	142	0	0
X	15593832	rs1270795706	C	T	p.Glu467Lys	c.1399G>A	missense	178371	4	0.00224252	12886	0	0	26421	1	0.00378487	7338	0	0	13380	0	0	15909	0	0	80106	3	0.00374504	4383	0	0	17948	0	0	3775	0	0	145	0	0	96	0	0	130	0	0	142	0	0
X	15593829	rs191860450	T	C	p.Ile468Val	c.1402A>G	missense	200372	168	0.0838441	18817	0	0	27021	0	0	7505	0	0	14385	164	1.14008	18518	0	0	90983	2	0.00219821	5207	1	0.0192049	17936	1	0.00557538	3775	2	0.0529801	145	0	0	96	0	0	130	0	0	142	0	0
X	15593818	rs200499668	G	A	p.Asp471Asp	c.1413C>T	synonymous	175944	1	0.000568363	12784	0	0	26017	0	0	7194	0	0	13192	0	0	15837	0	0	79309	1	0.00126089	4331	0	0	17280	0	0	3775	0	0	145	0	0	96	0	0	130	0	0	142	0	0
X	15591586	rs748359955	C	T	p.Arg482Gln	c.1445G>A	missense	170367	3	0.0017609	17124	1	0.00583976	21058	0	0	6101	0	0	11376	0	0	17702	0	0	80144	2	0.00249551	4229	0	0	12633	0	0	3775	0	0	145	0	0	96	0	0	130	0	0	142	0	0
X	15591584	.	C	G	p.Glu483Gln	c.1447G>C	missense	ND	0	0	ND	0	0	ND	0	0	ND	0	0	ND	0	0	ND	0	0	ND	0	0	ND	0	0	ND	0	0	3775	0	0	145	0	0	96	0	0	130	0	0	142	0	0
X	15591582	rs779752560	C	G	p.Glu483Asp	c.1449G>C	missense	150892	7	0.00463908	11398	0	0	20705	7	0.0338083	6076	0	0	10487	0	0	15263	0	0	70414	0	0	3460	0	0	13089	0	0	3775	0	0	145	0	0	96	0	0	130	0	0	142	0	0
X	15591582	rs779752560	C	T	p.Glu483Glu	c.1449G>A	synonymous	150892	1	0.000662726	11398	0	0	20705	0	0	6076	0	0	10487	0	0	15263	0	0	70414	1	0.00142017	3460	0	0	13089	0	0	3775	0	0	145	0	0	96	0	0	130	0	0	142	0	0
X	15591573	rs1480725606	C	A	p.Gly486Gly	c.1458G>T	synonymous	155445	1	0.000643314	11538	0	0	21595	0	0	6380	0	0	10779	0	0	15429	0	0	72207	0	0	3596	0	0	13921	1	0.00718339	3775	0	0	145	0	0	96	0	0	130	0	0	142	0	0
X	15591568	rs200973492	A	G	p.Val488Ala	c.1463T>C	missense	158104	1	0.000632495	11663	1	0.00857412	22256	0	0	6523	0	0	11011	0	0	15498	0	0	73143	0	0	3680	0	0	14330	0	0	3775	1	0.0264901	145	0	0	96	0	0	130	0	0	142	0	0
X	15591560	rs750415079	C	T	p.Val491Met	c.1471G>A	missense	159026	1	0.000628828	11643	0	0	22415	0	0	6612	0	0	11064	0	0	15555	0	0	73505	0	0	3714	1	0.0269251	14518	0	0	3775	0	0	145	0	0	96	0	0	130	0	0	142	0	0
X	15591550	rs765152220	T	A	p.Asp494Val	c.1481A>T	missense	161362	8	0.0049578	11828	0	0	22763	0	0	6745	0	0	11270	0	0	15630	0	0	74469	4	0.00537136	3778	0	0	14879	4	0.0268835	3775	0	0	145	0	0	96	0	0	130	0	0	142	0	0
X	15591534	rs1246309926	G	A	p.Asp499Asp	c.1497C>T	synonymous	159971	1	0.000625113	11810	0	0	22438	0	0	6643	0	0	11169	0	0	15581	0	0	74000	1	0.00135135	3754	0	0	14576	0	0	3775	0	0	145	0	0	96	0	0	130	0	0	142	0	0
X	15591530	rs140473595	C	T	p.Ala501Thr	c.1501G>A	missense	180457	4	0.00221659	17456	0	0	22805	0	0	6772	0	0	12041	0	0	18156	0	0	84290	4	0.00474552	4509	0	0	14428	0	0	3775	1	0.0264901	145	0	0	96	0	0	130	0	0	142	0	0
X	15591528	rs368996871	T	C	p.Ala501Ala	c.1503A>G	synonymous	159503	1	0.000626947	11794	0	0	22314	0	0	6613	0	0	11152	0	0	15575	0	0	73847	1	0.00135415	3727	0	0	14481	0	0	3775	0	0	145	0	0	96	0	0	130	0	0	142	0	0
X	15591522	rs748701949	C	T	p.Leu503Leu	c.1509G>A	synonymous	157619	1	0.000634441	11600	0	0	21984	0	0	6543	0	0	10944	0	0	15539	0	0	73080	0	0	3662	0	0	14267	1	0.00700918	3775	1	0.0264901	145	0	0	96	0	0	130	1	0.769231	142	0	0
X	15591521	rs760281053	A	T	p.Phe504Ile	c.1510T>A	missense	157699	2	0.00126824	11623	0	0	21995	0	0	6542	0	0	10976	0	0	15545	0	0	73096	2	0.00273613	3671	0	0	14251	0	0	3775	0	0	145	0	0	96	0	0	130	0	0	142	0	0
X	15591519	rs1285805675	G	T	p.Phe504Leu	c.1512C>A	missense	21595	1	0.0046307	5732	0	0	618	0	0	178	0	0	977	0	0	2595	0	0	10693	1	0.00935191	802	0	0				3775	0	0	145	0	0	96	0	0	130	0	0	142	0	0
X	15591514	rs775181355	A	G	p.Val506Ala	c.1517T>C	missense	152427	1	0.000656052	11325	0	0	20855	0	0	6252	0	0	10485	0	0	15392	0	0	71093	1	0.00140661	3509	0	0	13516	0	0	3775	0	0	145	0	0	96	0	0	130	0	0	142	0	0
X	15591503	rs779199005	A	G	p.Tyr510His	c.1528T>C	missense	145708	1	0.000686304	11071	0	0	19354	1	0.00516689	5873	0	0	10033	0	0	15142	0	0	68522	0	0	3318	0	0	12395	0	0	3775	1	0.0264901	145	0	0	96	0	0	130	0	0	142	0	0
X	15591500	.	A	G	p.Ser511Pro	c.1531T>C	missense	ND	0	0	ND	0	0	ND	0	0	ND	0	0	ND	0	0	ND	0	0	ND	0	0	ND	0	0	ND	0	0	3775	0	0	145	0	0	96	0	0	130	0	0	142	0	0
X	15590437	rs1406026054	T	G	p.Thr517Thr	c.1551A>C	synonymous	182116	1	0.000549101	13115	0	0	27169	0	0	7452	0	0	13764	0	0	15924	0	0	81384	1	0.00122874	4482	0	0	18826	0	0	3775	0	0	145	0	0	96	0	0	130	0	0	142	0	0
X	15590435	rs1158307424	C	G	p.Arg518Thr	c.1553G>C	missense	182136	1	0.00054904	13115	0	0	27181	0	0	7456	0	0	13773	0	0	15931	0	0	81370	0	0	4481	0	0	18829	1	0.00531096	3775	0	0	145	0	0	96	0	0	130	0	0	142	0	0
X	15590432	rs1445263977	G	A	p.Thr519Ile	c.1556C>T	missense	182390	1	0.000548276	13117	0	0	27225	0	0	7472	0	0	13786	0	0	15946	0	0	81481	1	0.00122728	4488	0	0	18875	0	0	3775	0	0	145	0	0	96	0	0	130	0	0	142	0	0
X	15590427	rs759200680	A	G	p.Tyr521His	c.1561T>C	missense	182711	1	0.000547312	13140	0	0	27288	0	0	7474	0	0	13815	0	0	15967	0	0	81585	1	0.00122572	4500	0	0	18942	0	0	3775	0	0	145	0	0	96	0	0	130	0	0	142	0	0
X	15590425	rs751987956	G	A	p.Tyr521Tyr	c.1563C>T	synonymous	182747	2	0.00109441	13139	0	0	27307	2	0.00732413	7472	0	0	13806	0	0	15959	0	0	81591	0	0	4504	0	0	18969	0	0	3775	0	0	145	0	0	96	0	0	130	0	0	142	0	0
X	15590410	rs1176549305	T	C	p.Gln526Gln	c.1578A>G	synonymous	21993	1	0.0045469	5873	1	0.0170271	621	0	0	180	0	0	997	0	0	2625	0	0	10886	0	0	811	0	0				3775	0	0	145	0	0	96	0	0	130	0	0	142	0	0
X	15590404	rs766808999	T	C	p.Ala528Ala	c.1584A>G	synonymous	183051	1	0.000546296	13152	1	0.00760341	27354	0	0	7485	0	0	13839	0	0	15994	0	0	81686	0	0	4513	0	0	19028	0	0	3775	0	0	145	0	0	96	0	0	130	0	0	142	0	0
X	15590394	rs763593286	C	T	p.Ala532Thr	c.1594G>A	missense	183048	10	0.00546305	13155	0	0	27354	0	0	7484	0	0	13839	0	0	15990	0	0	81688	0	0	4510	0	0	19028	10	0.0525541	3775	0	0	145	0	0	96	0	0	130	0	0	142	0	0
X	15590387	rs773746588	T	C	p.Lys534Arg	c.1601A>G	missense	183104	1	0.000546138	13156	0	0	27370	0	0	7485	0	0	13839	0	0	15999	0	0	81704	1	0.00122393	4516	0	0	19035	0	0	3775	0	0	145	0	0	96	0	0	130	0	0	142	0	0
X	15590375	rs1315545082	G	A	p.Pro538Leu	c.1613C>T	missense	183023	1	0.000546379	13156	0	0	27359	0	0	7485	0	0	13837	0	0	15998	0	0	81661	0	0	4514	0	0	19013	1	0.00525956	3775	0	0	145	0	0	96	0	0	130	0	0	142	0	0
X	15590366	rs889263894	T	A	p.Lys541Ile	c.1622A>T	missense	204940	2	0.000975895	19057	2	0.0104948	27944	0	0	7659	0	0	14829	0	0	18631	0	0	92545	0	0	5315	0	0	18960	0	0	3775	0	0	145	0	0	96	0	0	130	0	0	142	0	0
X	15590357	rs769821600	A	T	p.Ile544Asn	c.1631T>A	missense	182577	1	0.000547714	13142	0	0	27255	0	0	7465	0	0	13814	0	0	15994	0	0	81558	1	0.00122612	4493	0	0	18856	0	0	3775	0	0	145	0	0	96	0	0	130	0	0	142	0	0
X	15590352	rs761944150	T	C	p.Asn546Asp	c.1636A>G	missense	204262	8	0.00391654	19030	7	0.036784	27784	0	0	7642	0	0	14782	0	0	18613	0	0	92352	1	0.00108281	5288	0	0	18771	0	0	3775	0	0	145	0	0	96	0	0	130	0	0	142	0	0
X	15590351	rs756905974	T	C	p.Asn546Ser	c.1637A>G	missense	182287	1	0.000548585	13125	0	0	27174	0	0	7464	0	0	13781	0	0	15991	0	0	81453	0	0	4482	0	0	18817	1	0.00531434	3775	1	0.0264901	145	0	0	96	0	0	130	0	0	142	0	0
X	15590348	rs373025684	G	A	p.Ser547Phe	c.1640C>T	missense	182130	1	0.000549058	13114	0	0	27146	0	0	7465	0	0	13775	1	0.00725953	15979	0	0	81398	0	0	4472	0	0	18781	0	0	3775	0	0	145	0	0	96	0	0	130	0	0	142	0	0
X	15590348	rs373025684	G	C	p.Ser547Cys	c.1640C>G	missense	204188	43	0.021059	19033	0	0	27765	4	0.0144066	7646	0	0	14769	0	0	18608	1	0.00537403	92304	36	0.0390016	5282	2	0.0378644	18781	0	0	3775	0	0	145	0	0	96	0	0	130	0	0	142	0	0
X	15590344	.	T	C	p.Thr548Thr	c.1644A>G	synonymous	ND	0	0	ND	0	0	ND	0	0	ND	0	0	ND	0	0	ND	0	0	ND	0	0	ND	0	0	ND	0	0	3775	0	0	145	0	0	96	0	0	130	0	0	142	0	0
X	15590330	rs899455705	T	G	p.Lys553Thr	c.1658A>C	missense	203145	2	0.000984518	19016	2	0.0105175	27534	0	0	7606	0	0	14709	0	0	18555	0	0	91953	0	0	5243	0	0	18529	0	0	3775	0	0	145	0	0	96	0	0	130	0	0	142	0	0
X	15589907	rs1016777825	C	G	p.Arg559Ser	c.1677G>C	missense	176230	1	0.00056744	12865	0	0	26063	1	0.00383686	7115	0	0	13274	0	0	15806	0	0	79364	0	0	4272	0	0	17471	0	0	3775	0	0	145	0	0	96	0	0	130	0	0	142	0	0
X	15589896	rs375352455	G	A	p.Ser563Leu	c.1688C>T	missense	177901	1	0.00056211	12892	0	0	26343	0	0	7243	0	0	13371	0	0	15876	0	0	79979	1	0.00125033	4340	0	0	17857	0	0	3775	0	0	145	0	0	96	0	0	130	0	0	142	0	0
X	15589891	rs750955307	G	A	p.Pro565Ser	c.1693C>T	missense	179344	1	0.000557588	12975	0	0	26622	0	0	7304	0	0	13510	0	0	15907	0	0	80460	1	0.00124285	4389	0	0	18177	0	0	3775	0	0	145	0	0	96	0	0	130	0	0	142	0	0
X	15589885	rs1212751713	T	C	p.Thr567Ala	c.1699A>G	missense	180108	1	0.000555222	12999	0	0	26737	0	0	7342	0	0	13584	0	0	15927	0	0	80737	1	0.00123859	4407	0	0	18375	0	0	3775	0	0	145	0	0	96	0	0	130	0	0	142	0	0
X	15589880	rs1029163828	T	A	p.Leu568Leu	c.1704A>T	synonymous	181877	2	0.00109964	13082	0	0	27104	0	0	7424	0	0	13739	0	0	15975	0	0	81297	1	0.00123006	4479	0	0	18777	1	0.00532566	3775	0	0	145	0	0	96	0	0	130	0	0	142	0	0
X	15589875	rs1305384714	A	G	p.Leu570Ser	c.1709T>C	missense	21745	1	0.00459876	5810	0	0	615	0	0	178	0	0	990	0	0	2607	0	0	10747	1	0.00930492	798	0	0				3775	0	0	145	0	0	96	0	0	130	0	0	142	0	0
X	15589866	rs1303528080	A	G	p.Val573Ala	c.1718T>C	missense	182139	2	0.00109806	13097	0	0	27128	0	0	7441	0	0	13753	2	0.0145423	15987	0	0	81437	0	0	4488	0	0	18808	0	0	3775	0	0	145	0	0	96	0	0	130	0	0	142	0	0
X	15589864	rs1406604641	C	T	p.Val574Ile	c.1720G>A	missense	182122	1	0.000549082	13097	0	0	27128	0	0	7442	0	0	13759	0	0	15992	0	0	81407	0	0	4486	0	0	18811	1	0.00531604	3775	0	0	145	0	0	96	0	0	130	0	0	142	0	0
X	15589861	rs1367658189	C	T	p.Gly575Arg	c.1723G>A	missense	182216	1	0.000548799	13088	0	0	27158	0	0	7443	0	0	13770	0	0	15991	0	0	81442	1	0.00122787	4488	0	0	18836	0	0	3775	0	0	145	0	0	96	0	0	130	0	0	142	0	0
X	15589839	rs150172355	C	T	p.Arg582Lys	c.1745G>A	missense	182540	3	0.00164348	13115	0	0	27235	0	0	7459	0	0	13784	0	0	16000	0	0	81559	3	0.00367832	4495	0	0	18893	0	0	3775	0	0	145	0	0	96	0	0	130	0	0	142	0	0
X	15589838	rs372924787	C	A	p.Arg582Ser	c.1746G>T	missense	204357	3	0.00146802	18947	3	0.0158336	27860	0	0	7635	0	0	14786	0	0	18616	0	0	92331	0	0	5293	0	0	18889	0	0	3775	0	0	145	0	0	96	0	0	130	0	0	142	0	0
X	15589832	rs776791252	C	T	p.Leu584Leu	c.1752G>A	synonymous	182445	1	0.00054811	13112	0	0	27214	0	0	7461	0	0	13777	0	0	16002	0	0	81526	1	0.0012266	4489	0	0	18864	0	0	3775	0	0	145	0	0	96	0	0	130	0	0	142	0	0
X	15589830	rs1173089368	A	G	p.Leu585Pro	c.1754T>C	missense	182499	1	0.000547948	13116	0	0	27223	0	0	7462	0	0	13773	1	0.00726058	16002	0	0	81539	0	0	4493	0	0	18891	0	0	3775	0	0	145	0	0	96	0	0	130	0	0	142	0	0
X	15589828	rs768685219	T	A	p.Asn586Tyr	c.1756A>T	missense	204321	2	0.000978852	18957	0	0	27844	0	0	7641	0	0	14772	0	0	18613	2	0.0107452	92309	0	0	5290	0	0	18895	0	0	3775	0	0	145	0	0	96	0	0	130	0	0	142	0	0
X	15589823	rs1423623219	G	A	p.Tyr587Tyr	c.1761C>T	synonymous	182418	1	0.000548192	13112	0	0	27206	0	0	7462	0	0	13758	0	0	15999	0	0	81509	1	0.00122686	4487	0	0	18885	0	0	3775	0	0	145	0	0	96	0	0	130	0	0	142	0	0
X	15589821	rs760929786	A	G	p.Phe588Ser	c.1763T>C	missense	182398	1	0.000548252	13100	0	0	27207	1	0.00367552	7466	0	0	13767	0	0	16000	0	0	81494	0	0	4487	0	0	18877	0	0	3775	0	0	145	0	0	96	0	0	130	0	0	142	0	0
X	15589818	rs1481648983	T	C	p.Glu589Gly	c.1766A>G	missense	182323	1	0.000548477	13094	0	0	27177	0	0	7464	0	0	13766	0	0	15997	1	0.00625117	81480	0	0	4486	0	0	18859	0	0	3775	0	0	145	0	0	96	0	0	130	0	0	142	0	0
X	15589817	rs775671955	C	T	p.Glu589Glu	c.1767G>A	synonymous	182245	1	0.000548712	13085	0	0	27166	0	0	7462	0	0	13753	1	0.00727114	15993	0	0	81447	0	0	4483	0	0	18856	0	0	3775	0	0	145	0	0	96	0	0	130	0	0	142	0	0
X	15589813	.	A	G	p.Leu591Leu	c.1771T>C	synonymous	ND	0	0	ND	0	0	ND	0	0	ND	0	0	ND	0	0	ND	0	0	ND	0	0	ND	0	0	ND	0	0	3775	0	0	145	0	0	96	0	0	130	0	0	142	0	0
X	15589806	rs140857723	G	T	p.Thr593Asn	c.1778C>A	missense	203470	3	0.00147442	18873	3	0.0158957	27657	0	0	7610	0	0	14689	0	0	18590	0	0	92078	0	0	5257	0	0	18716	0	0	3775	0	0	145	0	0	96	0	0	130	0	0	142	0	0
X	15589801	rs148036434	G	C	p.Leu595Val	c.1783C>G	missense	181366	3	0.00165411	13045	0	0	27007	0	0	7414	0	0	13686	0	0	15966	0	0	81162	3	0.00369631	4444	0	0	18642	0	0	3775	0	0	145	0	0	96	0	0	130	0	0	142	0	0
X	15589793	rs145437639	G	T	p.Asp597Glu	c.1791C>A	missense	202649	25	0.0123366	18851	23	0.122009	27546	0	0	7565	0	0	14644	0	0	18545	0	0	91764	2	0.0021795	5241	0	0	18493	0	0	3775	0	0	145	0	0	96	0	0	130	0	0	142	0	0
X	15589761	rs1201908212	G	A	p.Thr608Ile	c.1823C>T	missense	176175	1	0.000567617	12941	0	0	26440	0	0	7013	0	0	13516	0	0	15683	0	0	79067	0	0	4308	0	0	17207	1	0.00581159	3775	0	0	145	0	0	96	0	0	130	0	0	142	0	0
X	15589759	rs747988885	C	T	p.Asp609Asn	c.1825G>A	missense	174558	3	0.00171863	12913	2	0.0154883	26221	0	0	6897	0	0	13439	0	0	15628	0	0	78443	1	0.00127481	4264	0	0	16753	0	0	3775	0	0	145	0	0	96	0	0	130	0	0	142	0	0
X	15588474	rs201715513	C	A	p.Ala614Ser	c.1840G>T	missense	204499	35	0.017115	19146	0	0	27926	0	0	7640	0	0	14819	0	0	18521	6	0.0323957	92196	28	0.0303701	5309	1	0.0188359	18942	0	0	3775	0	0	145	0	0	96	0	0	130	0	0	142	0	0
X	15588470	rs773083611	T	C	p.Asp615Gly	c.1844A>G	missense	182530	5	0.00273928	13152	0	0	27339	5	0.0182889	7466	0	0	13828	0	0	15901	0	0	81343	0	0	4503	0	0	18998	0	0	3775	0	0	145	0	0	96	0	0	130	0	0	142	0	0
X	15588436	rs769444182	T	C	p.Ser626Ser	c.1878A>G	synonymous	182731	3	0.00164176	13153	0	0	27364	0	0	7470	0	0	13838	0	0	15896	0	0	81469	3	0.00368238	4507	0	0	19034	0	0	3775	0	0	145	0	0	96	0	0	130	0	0	142	0	0
X	15588434	rs748163894	G	A	p.Ala627Val	c.1880C>T	missense	182681	2	0.0010948	13153	0	0	27361	0	0	7472	0	0	13836	2	0.014455	15875	0	0	81446	0	0	4508	0	0	19030	0	0	3775	0	0	145	0	0	96	0	0	130	0	0	142	0	0
X	15588428	rs776696484	C	A	p.Gly629Val	c.1886G>T	missense	182678	1	0.000547411	13149	0	0	27366	0	0	7472	0	0	13831	1	0.00723014	15881	0	0	81451	0	0	4505	0	0	19023	0	0	3775	0	0	145	0	0	96	0	0	130	0	0	142	0	0
X	15588426	rs140312271	C	G	p.Asp630His	c.1888G>C	missense	182654	3	0.00164245	13149	0	0	27368	0	0	7474	0	0	13835	0	0	15869	0	0	81442	3	0.0036836	4503	0	0	19014	0	0	3775	0	0	145	0	0	96	0	0	130	0	0	142	0	0
X	15585948	rs1238269881	T	C	p.Tyr633Cys	c.1898A>G	missense	168525	1	0.000593384	12428	0	0	24264	0	0	7011	0	0	12401	0	0	15722	0	0	76986	1	0.00129894	4035	0	0	15678	0	0	3775	0	0	145	0	0	96	0	0	130	0	0	142	0	0
X	15585938	rs1315819425	G	A	p.Asn636Asn	c.1908C>T	synonymous	169652	5	0.00294721	12450	1	0.00803213	24375	0	0	7078	0	0	12452	0	0	15763	0	0	77444	4	0.00516502	4062	0	0	16028	0	0	3775	0	0	145	0	0	96	0	0	130	0	0	142	0	0
X	15585933	rs183135788	T	C	p.Asn638Ser	c.1913A>G	missense	193306	49	0.0253484	18458	0	0	25291	0	0	7315	0	0	13615	49	0.359897	18423	0	0	88983	0	0	4934	0	0	16287	0	0	3775	2	0.0529801	145	0	0	96	0	0	130	0	0	142	0	0
X	15585891	rs1334127098	C	T	p.Arg652Lys	c.1955G>A	missense	173658	1	0.000575844	12758	0	0	25114	0	0	7186	0	0	12991	0	0	15857	0	0	79031	1	0.00126533	4221	0	0	16500	0	0	3775	0	0	145	0	0	96	0	0	130	0	0	142	0	0
X	15585887	rs774412370	C	T	p.Gln653Gln	c.1959G>A	synonymous	171817	1	0.000582015	12685	0	0	24690	0	0	7068	0	0	12852	1	0.00778089	15831	0	0	78424	0	0	4185	0	0	16082	0	0	3775	0	0	145	0	0	96	0	0	130	0	0	142	0	0
X	15585885	rs1479485636	T	G	p.Tyr654Ser	c.1961A>C	missense	21968	1	0.00455208	5900	0	0	626	0	0	175	0	0	992	0	0	2609	0	0	10859	1	0.00920895	807	0	0				3775	0	0	145	0	0	96	0	0	130	0	0	142	0	0
X	15585879	rs199951323	A	C	p.Leu656Ter	c.1967T>G	stop_gained	169053	1	0.00059153	12576	0	0	24016	0	0	6913	0	0	12582	1	0.00794786	15789	0	0	77586	0	0	4084	0	0	15507	0	0	3775	1	0.0264901	145	0	0	96	0	0	130	0	0	142	0	0
X	15585874	rs1295899858	C	T	p.Val658Ile	c.1972G>A	missense	167905	1	0.000595575	12529	0	0	23769	0	0	6847	0	0	12515	1	0.00799041	15750	0	0	77161	0	0	4052	0	0	15282	0	0	3775	0	0	145	0	0	96	0	0	130	0	0	142	0	0
X	15585872	rs1418717992	T	C	p.Val658Val	c.1974A>G	synonymous	167960	1	0.00059538	12544	0	0	23762	1	0.0042084	6841	0	0	12543	0	0	15742	0	0	77211	0	0	4058	0	0	15259	0	0	3775	0	0	145	0	0	96	0	0	130	0	0	142	0	0
X	15585867	rs761507256	T	C	p.Asn660Ser	c.1979A>G	missense	166723	1	0.000599797	12491	0	0	23574	0	0	6763	0	0	12453	0	0	15677	0	0	76724	0	0	4029	0	0	15012	1	0.00666134	3775	0	0	145	0	0	96	0	0	130	0	0	142	0	0
X	15584490	rs1192635576	T	A	p.Glu667Val	c.2000A>T	missense	181134	1	0.000552077	13116	0	0	27048	0	0	7377	0	0	13729	0	0	15660	0	0	81172	0	0	4465	1	0.0223964	18567	0	0	3775	0	0	145	0	0	96	0	0	130	0	0	142	0	0
X	15584488	rs200180615	C	T	p.Glu668Lys	c.2002G>A	missense	181841	4	0.00219972	13126	0	0	27194	0	0	7420	0	0	13778	3	0.0217738	15691	0	0	81360	0	0	4483	0	0	18789	1	0.00532226	3775	2	0.0529801	145	0	0	96	0	0	130	0	0	142	0	0
X	15584478	rs753705431	C	G	p.Arg671Pro	c.2012G>C	missense	21666	1	0.00461553	5745	0	0	619	0	0	183	0	0	986	0	0	2611	0	0	10722	1	0.00932662	800	0	0				3775	0	0	145	0	0	96	0	0	130	0	0	142	0	0
X	15584478	rs753705431	C	T	p.Arg671Gln	c.2012G>A	missense	203887	4	0.00196187	18871	1	0.00529914	27841	0	0	7627	0	0	14771	0	0	18414	0	0	92187	3	0.00325425	5287	0	0	18889	0	0	3775	0	0	145	0	0	96	0	0	130	0	0	142	0	0
X	15584476	rs763939235	C	G	p.Val672Leu	c.2014G>C	missense	182307	2	0.00109705	13130	1	0.00761615	27220	0	0	7448	0	0	13798	1	0.00724743	15822	0	0	81509	0	0	4485	0	0	18895	0	0	3775	0	0	145	0	0	96	0	0	130	0	0	142	0	0
X	15584475	rs1449878623	A	G	p.Val672Ala	c.2015T>C	missense	182417	1	0.000548195	13129	0	0	27226	0	0	7452	0	0	13807	0	0	15863	1	0.00630398	81548	0	0	4491	0	0	18901	0	0	3775	0	0	145	0	0	96	0	0	130	0	0	142	0	0
X	15584472	rs1027571965	G	A	p.Ala673Val	c.2018C>T	missense	182508	1	0.000547921	13136	0	0	27259	0	0	7461	0	0	13797	0	0	15858	0	0	81558	1	0.00122612	4495	0	0	18944	0	0	3775	0	0	145	0	0	96	0	0	130	0	0	142	0	0
X	15584472	rs1027571965	G	C	p.Ala673Gly	c.2018C>G	missense	182508	1	0.000547921	13136	0	0	27259	0	0	7461	0	0	13797	0	0	15858	0	0	81558	0	0	4495	1	0.0222469	18944	0	0	3775	0	0	145	0	0	96	0	0	130	0	0	142	0	0
X	15584464	.	T	C	p.Lys676Glu	c.2026A>G	missense	ND	0	0	ND	0	0	ND	0	0	ND	0	0	ND	0	0	ND	0	0	ND	0	0	ND	0	0	ND	0	0	3775	0	0	145	0	0	96	0	0	130	0	0	142	0	0
X	15584460	rs760732432	G	A	p.Pro677Leu	c.2030C>T	missense	182640	1	0.000547525	13135	0	0	27265	0	0	7462	0	0	13814	0	0	15920	0	0	81566	0	0	4501	0	0	18977	1	0.00526954	3775	0	0	145	0	0	96	0	0	130	0	0	142	0	0
X	15584459	rs775548770	T	C	p.Pro677Pro	c.2031A>G	synonymous	182708	1	0.000547321	13144	0	0	27280	0	0	7464	0	0	13815	0	0	15926	0	0	81603	0	0	4500	0	0	18976	1	0.00526981	3775	0	0	145	0	0	96	0	0	130	0	0	142	0	0
X	15584450	rs758968315	G	A	p.Ser680Ser	c.2040C>T	synonymous	182633	1	0.000547546	13137	0	0	27262	1	0.00366811	7463	0	0	13811	0	0	15933	0	0	81565	0	0	4497	0	0	18965	0	0	3775	0	0	145	0	0	96	0	0	130	0	0	142	0	0
X	15584449	rs1346564574	A	C	p.Phe681Val	c.2041T>G	missense	182748	1	0.000547202	13144	0	0	27280	0	0	7464	0	0	13822	0	0	15951	0	0	81609	1	0.00122536	4499	0	0	18979	0	0	3775	0	0	145	0	0	96	0	0	130	0	0	142	0	0
X	15584438	rs770503198	A	G	p.Phe684Phe	c.2052T>C	synonymous	204646	2	0.000977297	18981	0	0	27916	0	0	7650	0	0	14824	0	0	18583	0	0	92405	2	0.00216439	5306	0	0	18981	0	0	3775	0	0	145	0	0	96	0	0	130	0	0	142	0	0
X	15584427	rs1284743203	G	C	p.Pro688Arg	c.2063C>G	missense	182721	1	0.000547282	13131	0	0	27276	0	0	7467	0	0	13817	1	0.00723746	15968	0	0	81588	0	0	4497	0	0	18977	0	0	3775	0	0	145	0	0	96	0	0	130	0	0	142	0	0
X	15584425	rs777410473	T	C	p.Lys689Glu	c.2065A>G	missense	182872	3	0.00164049	13144	0	0	27300	0	0	7474	0	0	13833	0	0	15975	0	0	81638	0	0	4503	0	0	19005	3	0.0157853	3775	1	0.0264901	145	0	0	96	0	0	130	1	0.769231	142	0	0
X	15584421		T	C	p.Asn690Ser	c.2069A>G	missense	182745	1	0.000547211	13141	0	0	27280	0	0	7469	0	0	13825	0	0	15974	0	0	81596	1	0.00122555	4494	0	0	18966	0	0	3775	0	0	145	0	0	96	0	0	130	0	0	142	0	0
X	15584420	rs4646179	A	G	p.Asn690Asn	c.2070T>C	synonymous	204643	1408	0.688027	18972	1222	6.44107	27911	90	0.322454	7642	43	0.56268	14826	0	0	18603	0	0	92429	32	0.0346212	5300	18	0.339623	18960	3	0.0158228	3775	85	2.25166	145	7	4.82759	96	3	3.125	130	0	0	142	0	0
X	15584417	rs770114482	C	T	p.Val691Val	c.2073G>A	synonymous	182734	1	0.000547244	13139	0	0	27282	0	0	7469	0	0	13828	0	0	15974	0	0	81588	1	0.00122567	4501	0	0	18953	0	0	3775	0	0	145	0	0	96	0	0	130	0	0	142	0	0
X	15584417	rs770114482	C	G	p.Val691Val	c.2073G>C	synonymous	182734	3	0.00164173	13139	0	0	27282	3	0.0109963	7469	0	0	13828	0	0	15974	0	0	81588	0	0	4501	0	0	18953	0	0	3775	0	0	145	0	0	96	0	0	130	0	0	142	0	0
X	15584416	rs149039346	A	G	p.Ser692Pro	c.2074T>C	missense	204669	115	0.0561883	19019	111	0.583627	27901	1	0.0035841	7647	0	0	14825	0	0	18601	0	0	92429	2	0.00216382	5300	0	0	18947	1	0.00527788	3775	5	0.13245	145	4	2.75862	96	0	0	130	0	0	142	0	0
X	15584412	rs781544129	T	C	p.Asp693Gly	c.2078A>G	missense	182743	1	0.000547217	13143	0	0	27298	0	0	7473	0	0	13828	0	0	15972	0	0	81572	1	0.00122591	4500	0	0	18957	0	0	3775	0	0	145	0	0	96	0	0	130	0	0	142	0	0
X	15584404	rs755445931	G	T	p.Pro696Thr	c.2086C>A	missense	182467	2	0.00109609	13136	0	0	27240	0	0	7459	0	0	13822	0	0	15962	0	0	81493	2	0.0024542	4487	0	0	18868	0	0	3775	0	0	145	0	0	96	0	0	130	0	0	142	0	0
X	15584401	rs751603885	T	C	p.Arg697Gly	c.2089A>G	missense	182443	46	0.0252134	13140	0	0	27233	0	0	7456	0	0	13822	0	0	15961	0	0	81486	0	0	4485	1	0.0222965	18860	45	0.2386	3775	0	0	145	0	0	96	0	0	130	0	0	142	0	0
X	15584383	rs780128908	C	A	p.Ala703Ser	c.2107G>T	missense	181136	3	0.00165621	13096	0	0	26972	0	0	7382	0	0	13752	0	0	15930	0	0	81077	3	0.00370019	4451	0	0	18476	0	0	3775	0	0	145	0	0	96	0	0	130	0	0	142	0	0
X	15584383	.	C	T	p.Ala703Thr	c.2107G>A	missense	ND	0	0	ND	0	0	ND	0	0	ND	0	0	ND	0	0	ND	0	0	ND	0	0	ND	0	0	ND	0	0	3775	0	0	145	0	0	96	0	0	130	0	0	142	0	0
X	15582338	rs372986872	C	T	p.Met706Ile	c.2118G>A	missense	141129	1	0.000708572	12297	0	0	17507	0	0	4289	0	0	11521	0	0	13927	0	0	67206	1	0.00148796	3273	0	0	11109	0	0	3775	0	0	145	0	0	96	0	0	130	0	0	142	0	0
X	15582334	rs776995986	G	A	p.Arg708Trp	c.2122C>T	missense	166300	3	0.00180397	18232	0	0	18956	0	0	4716	0	0	12773	0	0	16696	0	0	79171	3	0.00378927	4176	0	0	11580	0	0	3775	0	0	145	0	0	96	0	0	130	0	0	142	0	0
X	15582333	rs769062069	C	T	p.Arg708Gln	c.2123G>A	missense	144666	1	0.000691247	12372	0	0	18317	0	0	4584	0	0	11697	0	0	14133	0	0	68534	1	0.00145913	3377	0	0	11652	0	0	3775	0	0	145	0	0	96	0	0	130	0	0	142	0	0
X	15582331	rs1052746182	T	G	p.Ser709Arg	c.2125A>C	missense	145326	1	0.000688108	12424	0	0	18403	0	0	4607	0	0	11816	0	0	14149	0	0	68796	1	0.00145357	3402	0	0	11729	0	0	3775	0	0	145	0	0	96	0	0	130	0	0	142	0	0
X	15582328	rs901495523	G	A	p.Arg710Cys	c.2128C>T	missense	172894	5	0.00289195	18333	0	0	20747	0	0	5250	0	0	13152	1	0.00760341	17150	0	0	81483	4	0.004909	4387	0	0	12392	0	0	3775	0	0	145	0	0	96	0	0	130	0	0	142	0	0
X	15582327	rs370187012	C	T	p.Arg710His	c.2129G>A	missense	175150	7	0.00399657	18397	0	0	21671	0	0	5406	0	0	13295	2	0.0150432	17279	0	0	82050	5	0.00609385	4473	0	0	12579	0	0	3775	0	0	145	0	0	96	0	0	130	0	0	142	0	0
X	15582311	rs1174145055	G	A	p.Phe715Phe	c.2145C>T	synonymous	21825	2	0.0091638	5840	0	0	615	0	0	179	0	0	1003	0	0	2596	0	0	10795	2	0.0185271	797	0	0				3775	0	0	145	0	0	96	0	0	130	0	0	142	0	0
X	15582310	rs144869363	G	A	p.Arg716Cys	c.2146C>T	missense	161512	1	0.000619149	12685	0	0	22754	0	0	5932	0	0	12535	0	0	15143	0	0	74454	1	0.00134311	3900	0	0	14109	0	0	3775	0	0	145	0	0	96	0	0	130	0	0	142	0	0
X	15582309	rs200540199	C	T	p.Arg716His	c.2147G>A	missense	183368	15	0.00818027	18465	0	0	23408	2	0.00854409	6135	0	0	13545	0	0	17751	0	0	85220	12	0.0140812	4691	0	0	14153	1	0.00706564	3775	0	0	145	0	0	96	0	0	130	0	0	142	0	0
X	15582299	rs1350774050	G	T	p.Asp719Glu	c.2157C>A	missense	166244	1	0.000601525	12763	0	0	23697	1	0.00421994	6300	0	0	12769	0	0	15363	0	0	76201	0	0	4002	0	0	15149	0	0	3775	0	0	145	0	0	96	0	0	130	0	0	142	0	0
X	15582298	rs41303171	T	C	p.Asn720Asp	c.2158A>G	missense	188344	3054	1.6215	18620	50	0.268528	24365	66	0.27088	6493	110	1.69413	13784	0	0	17992	507	2.81792	87066	2195	2.52108	4817	60	1.24559	15207	66	0.434011	3775	17	0.450331	145	0	0	96	0	0	130	0	0	142	0	0
X	15582297	rs746153383	T	C	p.Asn720Ser	c.2159A>G	missense	166555	1	0.000600402	12761	1	0.00783638	23699	0	0	6321	0	0	12763	0	0	15387	0	0	76361	0	0	4010	0	0	15253	0	0	3775	0	0	145	0	0	96	0	0	130	0	0	142	0	0
X	15582287	rs1384877595	C	T	p.Glu723Glu	c.2169G>A	synonymous	171576	3	0.0017485	12809	0	0	24947	3	0.0120255	6760	0	0	12931	0	0	15658	0	0	77992	0	0	4188	0	0	16291	0	0	3775	0	0	145	0	0	96	0	0	130	0	0	142	0	0
X	15582280	rs139980377	C	G	p.Gly726Arg	c.2176G>C	missense	173470	2	0.00115294	12839	2	0.0155775	25339	0	0	6931	0	0	12985	0	0	15737	0	0	78589	0	0	4250	0	0	16800	0	0	3775	0	0	145	0	0	96	0	0	130	0	0	142	0	0
X	15582279	rs757492005	C	T	p.Gly726Glu	c.2177G>A	missense	173443	1	0.000576558	12826	0	0	25344	0	0	6924	0	0	12982	0	0	15733	0	0	78571	1	0.00127273	4245	0	0	16818	0	0	3775	0	0	145	0	0	96	0	0	130	0	0	142	0	0
X	15582278	rs752452705	C	T	p.Gly726Gly	c.2178G>A	synonymous	174141	1	0.000574247	12846	0	0	25470	0	0	6949	0	0	13018	0	0	15767	0	0	78841	1	0.00126838	4270	0	0	16980	0	0	3775	0	0	145	0	0	96	0	0	130	0	0	142	0	0
X	15582270	rs375923132	G	A	p.Pro729Leu	c.2186C>T	missense	198340	2	0.00100837	18723	1	0.00534102	26615	0	0	7317	0	0	14194	0	0	18424	0	0	90338	1	0.00110695	5141	0	0	17588	0	0	3775	0	0	145	0	0	96	0	0	130	0	0	142	0	0
X	15582267	rs1421749672	G	T	p.Thr730Lys	c.2189C>A	missense	177574	1	0.000563146	12947	0	0	26184	0	0	7208	0	0	13257	0	0	15861	0	0	79870	0	0	4371	0	0	17876	1	0.00559409	3775	0	0	145	0	0	96	0	0	130	0	0	142	0	0
X	15582265	rs147311723	G	A	p.Leu731Phe	c.2191C>T	missense	199315	286	0.143491	18743	268	1.42987	26815	13	0.0484803	7381	0	0	14236	0	0	18468	0	0	90628	3	0.00331024	5163	2	0.0387372	17881	0	0	3775	18	0.476821	145	2	1.37931	96	0	0	130	0	0	142	0	0
X	15582255	rs751484521	G	A	p.Pro734Leu	c.2201C>T	missense	177425	2	0.00112724	12912	0	0	26135	0	0	7200	0	0	13213	0	0	15856	0	0	79910	0	0	4348	0	0	17851	2	0.0112039	3775	0	0	145	0	0	96	0	0	130	0	0	142	0	0
X	15582251	rs1445361759	G	C	p.Asn735Lys	c.2205C>G	missense	177265	1	0.000564127	12899	0	0	26089	0	0	7210	0	0	13199	0	0	15847	0	0	79843	1	0.00125246	4344	0	0	17834	0	0	3775	0	0	145	0	0	96	0	0	130	0	0	142	0	0
X	15582247	rs1416534293	G	C	p.Pro737Ala	c.2209C>G	missense	177078	1	0.000564723	12885	0	0	26071	0	0	7198	0	0	13156	0	0	15858	0	0	79768	0	0	4351	0	0	17791	1	0.00562082	3775	0	0	145	0	0	96	0	0	130	0	0	142	0	0
X	15582238	rs1259850376	A	G	p.Ser740Pro	c.2218T>C	missense	21751	1	0.00459749	5833	0	0	620	0	0	173	0	0	988	0	0	2604	0	0	10735	1	0.00931532	798	0	0				3775	0	0	145	0	0	96	0	0	130	0	0	142	0	0
X	15582235	rs372923812	T	C	p.Ile741Val	c.2221A>G	missense	199312	20	0.0100345	18742	1	0.00533561	26805	5	0.0186532	7392	5	0.0676407	14224	0	0	18475	0	0	90632	8	0.0088269	5156	1	0.0193949	17886	0	0	3775	0	0	145	0	0	96	0	0	130	0	0	142	0	0
X	15582227	rs762444602	C	T	p.Leu743Leu	c.2229G>A	synonymous	176100	3	0.00170358	12818	0	0	25892	0	0	7184	0	0	13098	0	0	15835	0	0	79337	3	0.00378134	4315	0	0	17621	0	0	3775	0	0	145	0	0	96	0	0	130	0	0	142	0	0
X	15582223	rs772641644	C	T	p.Val745Ile	c.2233G>A	missense	197458	2	0.00101287	18632	0	0	26436	0	0	7325	0	0	14050	0	0	18414	0	0	89971	2	0.00222294	5090	0	0	17540	0	0	3775	0	0	145	0	0	96	0	0	130	0	0	142	0	0
X	15582209	rs35803318	C	T	p.Val749Val	c.2247G>A	synonymous	194422	7413	3.81284	18549	133	0.71702	25931	2010	7.75134	7107	734	10.3278	13918	0	0	18314	309	1.68723	88946	3935	4.42403	4994	234	4.68562	16663	58	0.348077	3775	79	2.09272	145	1	0.689655	96	0	0	130	0	0	142	0	0
X	15582204	rs761405491	C	T	p.Gly751Glu	c.2252G>A	missense	171542	2	0.0011659	12774	0	0	25157	0	0	6830	0	0	12912	0	0	15672	0	0	77769	2	0.00257172	4183	0	0	16245	0	0	3775	0	0	145	0	0	96	0	0	130	0	0	142	0	0
X	15582197	rs776886768	T	C	p.Ile753Met	c.2259A>G	missense	171463	1	0.000583216	12897	0	0	25280	0	0	6698	0	0	13124	0	0	15592	0	0	77626	0	0	4189	0	0	16057	1	0.00622781	3775	0	0	145	0	0	96	0	0	130	0	0	142	0	0
X	15582175	rs769030917	T	C	p.Ile761Val	c.2281A>G	missense	158997	1	0.000628943	12659	0	0	22902	0	0	5706	0	0	12517	0	0	15016	0	0	73193	1	0.00136625	3816	0	0	13188	0	0	3775	0	0	145	0	0	96	0	0	130	0	0	142	0	0
X	15582157	rs747516757	C	G	p.Asp767His	c.2299G>C	missense	148940	2	0.00134282	12440	0	0	20581	2	0.0097177	4888	0	0	12047	0	0	14462	0	0	69541	0	0	3527	0	0	11454	0	0	3775	0	0	145	0	0	96	0	0	130	0	0	142	0	0
X	15582154	rs140016715	G	A	p.Arg768Trp	c.2302C>T	missense	144381	2	0.00138522	12302	1	0.00812876	19340	0	0	4563	0	0	11708	1	0.00854117	14204	0	0	67920	0	0	3390	0	0	10954	0	0	3775	0	0	145	0	0	96	0	0	130	0	0	142	0	0
X	15582151	rs772347875	T	C	p.Lys769Glu	c.2305A>G	missense	144317	1	0.000692919	12377	0	0	19541	1	0.00511745	4447	0	0	11853	0	0	14160	0	0	67737	0	0	3404	0	0	10798	0	0	3775	0	0	145	0	0	96	0	0	130	0	0	142	0	0
X	15580134	rs1323382709	T	C	p.Lys771Arg	c.2312A>G	missense	22038	1	0.00453762	5953	0	0	616	0	0	179	0	0	1005	1	0.0995025	2583	0	0	10893	0	0	809	0	0				3775	0	0	145	0	0	96	0	0	130	0	0	142	0	0
X	15580131	rs764682532	T	C	p.Asn772Ser	c.2315A>G	missense	199302	12	0.00602101	18949	0	0	26390	12	0.0454718	7450	0	0	14403	0	0	18451	0	0	91036	0	0	5189	0	0	17434	0	0	3775	0	0	145	0	0	96	0	0	130	0	0	142	0	0
X	15580126	rs761408882	C	G	p.Ala774Pro	c.2320G>C	missense	178079	1	0.000561549	13025	0	0	26000	0	0	7307	0	0	13454	0	0	15890	0	0	80376	0	0	4397	0	0	17630	1	0.00567215	3775	0	0	145	0	0	96	0	0	130	0	0	142	0	0
X	15580126	rs761408882	C	T	p.Ala774Thr	c.2320G>A	missense	178079	1	0.000561549	13025	0	0	26000	0	0	7307	0	0	13454	0	0	15890	0	0	80376	1	0.00124415	4397	0	0	17630	0	0	3775	0	0	145	0	0	96	0	0	130	0	0	142	0	0
X	15580125	rs1307986087	G	C	p.Ala774Gly	c.2321C>G	missense	178061	1	0.000561605	13023	0	0	26004	0	0	7314	0	0	13458	1	0.00743052	15893	0	0	80328	0	0	4397	0	0	17644	0	0	3775	0	0	145	0	0	96	0	0	130	0	0	142	0	0
X	15580124	rs764422604	T	G	p.Ala774Ala	c.2322A>C	synonymous	178357	2	0.00112135	13035	0	0	26055	0	0	7324	0	0	13481	2	0.0148357	15902	0	0	80470	0	0	4408	0	0	17682	0	0	3775	0	0	145	0	0	96	0	0	130	0	0	142	0	0
X	15580124	rs764422604	T	A	p.Ala774Ala	c.2322A>T	synonymous	178357	1	0.000560673	13035	0	0	26055	0	0	7324	0	0	13481	0	0	15902	0	0	80470	1	0.0012427	4408	0	0	17682	0	0	3775	0	0	145	0	0	96	0	0	130	0	0	142	0	0
X	15580118	rs1228927272	A	T	p.Ser776Arg	c.2328T>A	missense	21977	1	0.00455021	5914	1	0.016909	619	0	0	179	0	0	1009	0	0	2596	0	0	10853	0	0	807	0	0				3775	0	0	145	0	0	96	0	0	130	0	0	142	0	0
X	15580115	rs375252585	T	C	p.Gly777Gly	c.2331A>G	synonymous	201503	17	0.0084366	18993	0	0	26995	0	0	7562	0	0	14579	0	0	18537	12	0.0647354	91597	5	0.00545869	5247	0	0	17993	0	0	3775	0	0	145	0	0	96	0	0	130	0	0	142	0	0
X	15580105	rs902013280	A	G	p.Tyr781His	c.2341T>C	missense	202744	3	0.0014797	19032	0	0	27291	0	0	7603	0	0	14656	0	0	18561	0	0	91958	3	0.00326236	5263	0	0	18380	0	0	3775	0	0	145	0	0	96	0	0	130	0	0	142	0	0
X	15580103	rs1277737097	A	G	p.Tyr781Tyr	c.2343T>C	synonymous	180743	1	0.000553272	13084	1	0.00764292	26691	0	0	7428	0	0	13654	0	0	15960	0	0	81081	0	0	4451	0	0	18394	0	0	3775	0	0	145	0	0	96	0	0	130	0	0	142	0	0
X	15580101	rs147487891	G	A	p.Ala782Val	c.2345C>T	missense	180969	11	0.00607839	13086	0	0	26786	2	0.00746659	7431	0	0	13669	0	0	15952	0	0	81095	8	0.00986497	4452	1	0.0224618	18498	0	0	3775	0	0	145	0	0	96	0	0	130	0	0	142	0	0
X	15580094	rs760076142	G	T	p.Ile784Ile	c.2352C>A	synonymous	180989	1	0.00055252	13089	0	0	26779	0	0	7425	0	0	13672	0	0	15959	0	0	81119	1	0.00123276	4460	0	0	18486	0	0	3775	0	0	145	0	0	96	0	0	130	0	0	142	0	0
X	15580093	rs373153165	C	T	p.Asp785Asn	c.2353G>A	missense	181029	7	0.00386678	13099	1	0.00763417	26800	3	0.011194	7425	0	0	13674	1	0.00731315	15964	0	0	81141	2	0.00246485	4458	0	0	18468	0	0	3775	0	0	145	0	0	96	0	0	130	0	0	142	0	0
X	15580075	.	T	C	p.Asn791Asp	c.2371A>G	missense	ND	0	0	ND	0	0	ND	0	0	ND	0	0	ND	0	0	ND	0	0	ND	0	0	ND	0	0	ND	0	0	3775	0	0	145	0	0	96	0	0	130	0	0	142	0	0
X	15580068	rs1457512583	G	A	p.Pro793Leu	c.2378C>T	missense	179429	1	0.000557324	13054	0	0	26345	1	0.00379579	7353	0	0	13553	0	0	15926	0	0	80791	0	0	4424	0	0	17983	0	0	3775	0	0	145	0	0	96	0	0	130	0	0	142	0	0
X	15580059	rs1355591379	T	C	p.Gln796Arg	c.2387A>G	missense	179656	2	0.00111324	13071	0	0	26419	0	0	7361	0	0	13580	0	0	15934	0	0	80846	2	0.00247384	4437	0	0	18008	0	0	3775	0	0	145	0	0	96	0	0	130	0	0	142	0	0
X	15580044	rs1464340051	A	C	p.Val801Gly	c.2402T>G	missense	178022	1	0.000561728	13027	0	0	25959	0	0	7260	0	0	13480	0	0	15903	0	0	80404	0	0	4388	0	0	17601	1	0.0056815	3775	0	0	145	0	0	96	0	0	130	0	0	142	0	0
X	15580043	rs1423362553	A	G	p.Val801Val	c.2403T>C	synonymous	177970	1	0.000561892	13027	0	0	25949	1	0.00385371	7261	0	0	13482	0	0	15900	0	0	80374	0	0	4387	0	0	17590	0	0	3775	0	0	145	0	0	96	0	0	130	0	0	142	0	0
X	15580035	rs771107251	G	A	p.Ser804Phe	c.2411C>T	missense	172377	1	0.000580124	12828	1	0.00779545	24337	0	0	6961	0	0	13017	0	0	15770	0	0	78773	0	0	4223	0	0	16468	0	0	3775	0	0	145	0	0	96	0	0	130	0	0	142	0	0
X	15580033	rs749525058	A	T	p.Phe805Ile	c.2413T>A	missense	172347	4	0.0023209	12841	0	0	24240	0	0	6941	0	0	13061	0	0	15754	0	0	78875	4	0.00507132	4222	0	0	16413	0	0	3775	0	0	145	0	0	96	0	0	130	0	0	142	0	0
[truncated: 81 more columns]
